# Supplementary material for: Exploring the Leaf Beetle Fauna (Coleoptera: Chrysomelidae) of an Ecuadorian Mountain Forest Using DNA Barcoding
Source: PubMed Central journal article supplement (PMC4744027; doi:10.1371/journal.pone.0148268), 2016-02-05
Supplement: pone.0148268.s005.pdf [file pone.0148268.s005.pdf]

**Table S3. Results of species delimitation for each specimen.**

| Specimen                    | Morphospecies       | Haplotype-Network | 3% Dist.- Cluster | 5% Dist.- Cluster | 7.5% Dist.- Cluster | GMYC-Cluster | PTP-Cluster | Haplotype |
|-----------------------------|---------------------|-------------------|-------------------|-------------------|---------------------|--------------|-------------|-----------|
| BT_0001_Eumolpinae sp. 1    | Eumolpinae sp. 1    | Network282        | 3Cluster001       | 5Cluster001       | 75Cluster001        | GMYC008      | PTP023      | H416      |
| BT_0002_Alticinae sp. 42    | Alticinae sp. 42    | Network52         | 3Cluster002       | 5Cluster002       | 75Cluster002        | GMYC219      | PTP114      | H085      |
| BT_0004_Eumolpinae sp. 42   | Eumolpinae sp. 42   | Network257        | 3Cluster003       | 5Cluster003       | 75Cluster003        | GMYC001      | PTP003      | H388      |
| BT_0005_Galerucinae sp. 40  | Galerucinae sp. 40  | Network216        | 3Cluster004       | 5Cluster004       | 75Cluster004        | GMYC100      | PTP238      | H329      |
| BT_0007_Galerucinae sp. 38  | Galerucinae sp. 38  | Network98         | 3Cluster005       | 5Cluster005       | 75Cluster005        | GMYC117      | PTP272      | H154      |
| BT_0008_Alticinae sp. 243   | Alticinae sp. 243   | Network54         | 3Cluster006       | 5Cluster006       | 75Cluster006        | GMYC220      | PTP115      | H088      |
| BT_0012_Eumolpinae sp. 21   | Eumolpinae sp. 21   | Network270        | 3Cluster007       | 5Cluster007       | 75Cluster007        | GMYC022      | PTP007      | H401      |
| BT_0015_Galerucinae sp. 76  | Galerucinae sp. 76  | Network118        | 3Cluster008       | 5Cluster008       | 75Cluster008        | GMYC113      | PTP288      | H185      |
| BT_0017_Alticinae sp. 43    | Alticinae sp. 43    | Network49         | 3Cluster009       | 5Cluster009       | 75Cluster009        | GMYC227      | PTP122      | H081      |
| BT_0021_Alticinae sp. 7     | Alticinae sp. 7     | Network187        | 3Cluster010       | 5Cluster010       | 75Cluster010        | GMYC087      | PTP204      | H285      |
| BT_0022_Alticinae sp. 219   | Alticinae sp. 219   | Network190        | 3Cluster011       | 5Cluster011       | 75Cluster011        | GMYC089      | PTP202      | H288      |
| BT_0024_Galerucinae sp. 1   | Galerucinae sp. 1   | Network112        | 3Cluster011       | 5Cluster012       | 75Cluster012        | GMYC138      | PTP264      | H176      |
| BT_0033_Galerucinae sp. 37  | Galerucinae sp. 37  | Network116        | 3Cluster012       | 5Cluster013       | 75Cluster013        | GMYC115      | PTP286      | H181      |
| BT_0034_Eumolpinae sp. 14   | Eumolpinae sp. 14   | Network285        | 3Cluster013       | 5Cluster014       | 75Cluster014        | GMYC009      | PTP016      | H419      |
| BT_0035_Eumolpinae sp. 006  | Eumolpinae sp. 006  | Network275        | 3Cluster014       | 5Cluster015       | 75Cluster015        | GMYC017      | PTP025      | H407      |
| BT_0036_Galerucinae sp. 11  | Galerucinae sp. 11  | Network103        | 3Cluster015       | 5Cluster016       | 75Cluster016        | GMYC143      | PTP258      | H160      |
| BT_0043_Galerucinae sp. 5   | Galerucinae sp. 5   | Network110        | 3Cluster016       | 5Cluster017       | 75Cluster017        | GMYC137      | PTP265      | H172      |
| BT_0046_Alticinae sp. 243   | Alticinae sp. 243   | Network53         | 3Cluster006       | 5Cluster006       | 75Cluster006        | GMYC221      | PTP116      | H087      |
| BT_0047_Alticinae sp. 42    | Alticinae sp. 42    | Network52         | 3Cluster002       | 5Cluster002       | 75Cluster002        | GMYC219      | PTP114      | H086      |
| BT_0048_Galerucinae sp. 39  | Galerucinae sp. 39  | Network97         | 3Cluster017       | 5Cluster018       | 75Cluster018        | GMYC118      | PTP271      | H153      |
| BT_0049_Galerucinae sp. 41  | Galerucinae sp. 41  | Network217        | 3Cluster018       | 5Cluster019       | 75Cluster019        | GMYC101      | PTP237      | H330      |
| BT_0088_Galerucinae sp. 7   | Galerucinae sp. 7   | Network109        | 3Cluster019       | 5Cluster020       | 75Cluster020        | GMYC134      | PTP267      | H170      |
| BT_0089_Eumolpinae sp. 1    | Eumolpinae sp. 1    | Network282        | 3Cluster001       | 5Cluster001       | 75Cluster001        | GMYC008      | PTP023      | H416      |
| BT_0090_Galerucinae sp. 76  | Galerucinae sp. 76  | Network118        | 3Cluster008       | 5Cluster008       | 75Cluster008        | GMYC113      | PTP288      | H184      |
| BT_0091_Eumolpinae sp. 1    | Eumolpinae sp. 1    | Network282        | 3Cluster001       | 5Cluster001       | 75Cluster001        | GMYC008      | PTP023      | H416      |
| BT_0094_Galerucinae sp. 11  | Galerucinae sp. 11  | Network103        | 3Cluster015       | 5Cluster016       | 75Cluster016        | GMYC143      | PTP258      | H161      |
| BT_0095_Cassidinae sp. 1    | Cassidinae sp. 1    | Network261        | 3Cluster020       | 5Cluster021       | 75Cluster021        | GMYC280      | PTP038      | H392      |
| BT_0096_Alticinae sp. 10    | Alticinae sp. 10    | Network195        | 3Cluster021       | 5Cluster022       | 75Cluster022        | GMYC097      | PTP195      | H303      |
| BT_0098_Galerucinae sp. 002 | Galerucinae sp. 002 | Network111        | 3Cluster022       | 5Cluster023       | 75Cluster023        | GMYC139      | PTP263      | H173      |
| BT_0099_Galerucinae sp. 7   | Galerucinae sp. 7   | Network92         | 3Cluster023       | 5Cluster024       | 75Cluster024        | GMYC126      | PTP284      | H147      |
| BT_0102_Alticinae sp. 44    | Alticinae sp. 44    | Network42         | 3Cluster024       | 5Cluster025       | 75Cluster025        | GMYC214      | PTP104      | H060      |
| BT_0103_Eumolpinae sp. 38   | Eumolpinae sp. 38   | Network284        | 3Cluster025       | 5Cluster026       | 75Cluster026        | GMYC010      | PTP017      | H418      |
| BT_0107_Galerucinae sp. 46  | Galerucinae sp. 46  | Network155        | 3Cluster026       | 5Cluster027       | 75Cluster027        | GMYC178      | PTP249      | H241      |
| BT_0109_Alticinae sp. 251   | Alticinae sp. 251   | Network81         | 3Cluster027       | 5Cluster028       | 75Cluster028        | GMYC057      | PTP156      | H124      |
| BT_0110_Alticinae sp. 87    | Alticinae sp. 87    | Network88         | 3Cluster028       | 5Cluster029       | 75Cluster029        | GMYC061      | PTP164      | H136      |
| BT_0114_Galerucinae sp. 62  | Galerucinae sp. 62  | Network205        | 3Cluster029       | 5Cluster030       | 75Cluster030        | GMYC111      | PTP239      | H317      |
| BT_0115_Alticinae sp. 98    | Alticinae sp. 98    | Network10         | 3Cluster030       | 5Cluster031       | 75Cluster031        | GMYC253      | PTP060      | H010      |
| BT_0118_Eumolpinae sp. 19   | Eumolpinae sp. 19   | Network265        | 3Cluster031       | 5Cluster032       | 75Cluster032        | GMYC028      | PTP004      | H396      |
| BT_0119_Alticinae sp. 124   | Alticinae sp. 124   | Network87         | 3Cluster032       | 5Cluster033       | 75Cluster033        | GMYC048      | PTP166      | H135      |
| BT_0121_Alticinae sp. 107   | Alticinae sp. 107   | Network218        | 3Cluster033       | 5Cluster034       | 75Cluster034        | GMYC062      | PTP141      | H331      |
| BT_0123_Alticinae sp. 129   | Alticinae sp. 129   | Network212        | 3Cluster034       | 5Cluster035       | 75Cluster035        | GMYC065      | PTP098      | H325      |
| BT_0125_Alticinae sp. 97    | Alticinae sp. 97    | Network13         | 3Cluster035       | 5Cluster036       | 75Cluster036        | GMYC258      | PTP065      | H020      |
| BT_0126_Alticinae sp. 123   | Alticinae sp. 123   | Network148        | 3Cluster036       | 5Cluster037       | 75Cluster037        | GMYC070      | PTP144      | H228      |
| BT_0130_Galerucinae sp. 34  | Galerucinae sp. 34  | Network183        | 3Cluster037       | 5Cluster038       | 75Cluster038        | GMYC103      | PTP232      | H280      |
| BT_0134_Galerucinae sp. 7   | Galerucinae sp. 7   | Network92         | 3Cluster023       | 5Cluster024       | 75Cluster024        | GMYC126      | PTP284      | H148      |
| BT_0135_Eumolpinae sp. 19   | Eumolpinae sp. 19   | Network265        | 3Cluster031       | 5Cluster032       | 75Cluster032        | GMYC028      | PTP004      | H396      |
| BT_0137_Cassidinae sp. 4    | Cassidinae sp. 4    | Network253        | 3Cluster038       | 5Cluster039       | 75Cluster039        | GMYC284      | PTP053      | H379      |
| BT_0139_Alticinae sp. 10    | Alticinae sp. 10    | Network195        | 3Cluster021       | 5Cluster022       | 75Cluster022        | GMYC097      | PTP195      | H304      |
| BT_0140_Alticinae sp. 28    | Alticinae sp. 28    | Network29         | 3Cluster039       | 5Cluster040       | 75Cluster040        | GMYC209      | PTP129      | H041      |
| BT_0144_Eumolpinae sp. 38   | Eumolpinae sp. 38   | Network283        | 3Cluster040       | 5Cluster041       | 75Cluster041        | GMYC011      | PTP018      | H417      |
| BT_0145_Galerucinae sp. 61  | Galerucinae sp. 61  | Network93         | 3Cluster041       | 5Cluster042       | 75Cluster042        | GMYC131      | PTP279      | H149      |
| BT_0146_Alticinae sp. 29    | Alticinae sp. 29    | Network68         | 3Cluster042       | 5Cluster043       | 75Cluster043        | GMYC049      | PTP168      | H107      |
| BT_0147_Alticinae sp. 62    | Alticinae sp. 62    | Network57         | 3Cluster043       | 5Cluster044       | 75Cluster044        | GMYC224      | PTP117      | H092      |
| BT_0148_Alticinae sp. 66    | Alticinae sp. 66    | Network85         | 3Cluster044       | 5Cluster045       | 75Cluster045        | GMYC051      | PTP169      | H131      |
| BT_0149_Alticinae sp. 249   | Alticinae sp. 249   | Network79         | 3Cluster045       | 5Cluster046       | 75Cluster046        | GMYC037      | PTP147      | H121      |
| BT_0153_Alticinae sp. 109   | Alticinae sp. 109   | Network171        | 3Cluster046       | 5Cluster047       | 75Cluster047        | GMYC254      | PTP062      | H264      |
| BT_0154_Alticinae sp. 115   | Alticinae sp. 115   | Network10         | 3Cluster030       | 5Cluster031       | 75Cluster031        | GMYC253      | PTP060      | H010      |
| BT_0155_Alticinae sp. 193   | Alticinae sp. 193   | Network172        | 3Cluster047       | 5Cluster048       | 75Cluster048        | GMYC243      | PTP206      | H266      |
| BT_0157_Alticinae sp. 97    | Alticinae sp. 97    | Network11         | 3Cluster048       | 5Cluster049       | 75Cluster049        | GMYC256      | PTP064      | H015      |
| BT_0158_Eumolpinae sp. 2    | Eumolpinae sp. 2    | Network285        | 3Cluster013       | 5Cluster014       | 75Cluster014        | GMYC009      | PTP016      | H419      |
| BT_0159_Galerucinae sp. 096 | Galerucinae sp. 096 | Network180        | 3Cluster049       | 5Cluster050       | 75Cluster050        | GMYC174      | PTP252      | H277      |
| BT_0174_Galerucinae sp. 46  | Galerucinae sp. 46  | Network155        | 3Cluster026       | 5Cluster027       | 75Cluster027        | GMYC178      | PTP249      | H241      |
| BT_0176_Galerucinae sp. 46  | Galerucinae sp. 46  | Network156        | 3Cluster050       | 5Cluster051       | 75Cluster051        | GMYC179      | PTP250      | H242      |
| BT_0183_Galerucinae sp. 34  | Galerucinae sp. 34  | Network183        | 3Cluster037       | 5Cluster038       | 75Cluster038        | GMYC103      | PTP232      | H280      |
| BT_0188_Galerucinae sp. 11  | Galerucinae sp. 11  | Network103        | 3Cluster015       | 5Cluster016       | 75Cluster016        | GMYC143      | PTP258      | H162      |

|                             |                     |            |             |             |              |         |        |      |
|-----------------------------|---------------------|------------|-------------|-------------|--------------|---------|--------|------|
| BT_0189_Alticinae sp.161    | Alticinae sp.161    | Network38  | 3Cluster051 | 5Cluster052 | 75Cluster052 | GMYC151 | PTP071 | H053 |
| BT_0190_Eumolpinae sp. 1    | Eumolpinae sp. 1    | Network282 | 3Cluster001 | 5Cluster001 | 75Cluster001 | GMYC008 | PTP023 | H416 |
| BT_0196_Galerucinae sp. 10  | Galerucinae sp. 10  | Network232 | 3Cluster052 | 5Cluster053 | 75Cluster053 | GMYC076 | PTP228 | H353 |
| BT_0199_Alticinae sp. 118   | Alticinae sp. 118   | Network170 | 3Cluster053 | 5Cluster054 | 75Cluster054 | GMYC187 | PTP108 | H262 |
| BT_0201_Chrysomelinae sp. 2 | Chrysomelinae sp. 2 | Network206 | 3Cluster054 | 5Cluster055 | 75Cluster055 | GMYC102 | PTP236 | H318 |
| BT_0202_Galerucinae sp. 32  | Galerucinae sp. 32  | Network2   | 3Cluster055 | 5Cluster056 | 75Cluster056 | GMYC175 | PTP247 | H002 |
| BT_0204_Hispinae sp. 2      | Hispinae sp. 2      | Network255 | 3Cluster056 | 5Cluster057 | 75Cluster057 | GMYC273 | PTP051 | H382 |
| BT_0207_Galerucinae sp. 69  | Galerucinae sp. 69  | Network219 | 3Cluster057 | 5Cluster058 | 75Cluster058 | GMYC086 | PTP215 | H333 |
| BT_0208_Eumolpinae sp. 19   | Eumolpinae sp. 19   | Network265 | 3Cluster031 | 5Cluster032 | 75Cluster032 | GMYC028 | PTP004 | H396 |
| BT_0209_Cassidinae sp. 5    | Cassidinae sp. 5    | Network242 | 3Cluster058 | 5Cluster059 | 75Cluster059 | GMYC277 | PTP043 | H364 |
| BT_0211_Alticinae sp. 87    | Alticinae sp. 87    | Network88  | 3Cluster028 | 5Cluster029 | 75Cluster029 | GMYC061 | PTP164 | H136 |
| BT_0212_Galerucinae sp. 66  | Galerucinae sp. 66  | Network223 | 3Cluster059 | 5Cluster060 | 75Cluster060 | GMYC079 | PTP222 | H341 |
| BT_0213_Galerucinae sp. 24  | Galerucinae sp. 24  | Network197 | 3Cluster060 | 5Cluster061 | 75Cluster061 | GMYC108 | PTP230 | H306 |
| BT_0214_Alticinae sp. 28    | Alticinae sp. 28    | Network29  | 3Cluster039 | 5Cluster040 | 75Cluster040 | GMYC209 | PTP129 | H043 |
| BT_0218_Galerucinae sp. 31  | Galerucinae sp. 31  | Network203 | 3Cluster061 | 5Cluster062 | 75Cluster062 | GMYC084 | PTP217 | H313 |
| BT_0219_Eumolpinae sp. 073  | Eumolpinae sp. 073  | Network244 | 3Cluster062 | 5Cluster063 | 75Cluster063 | GMYC031 | PTP002 | H368 |
| BT_0220_Alticinae sp. 115   | Alticinae sp. 115   | Network10  | 3Cluster030 | 5Cluster031 | 75Cluster031 | GMYC253 | PTP060 | H010 |
| BT_0221_Eumolpinae sp. 10   | Eumolpinae sp. 10   | Network274 | 3Cluster063 | 5Cluster064 | 75Cluster064 | GMYC021 | PTP008 | H406 |
| BT_0223_Galerucinae sp. 34  | Galerucinae sp. 34  | Network183 | 3Cluster037 | 5Cluster038 | 75Cluster038 | GMYC103 | PTP232 | H280 |
| BT_0227_Cassidinae sp. 14   | Cassidinae sp. 14   | Network262 | 3Cluster064 | 5Cluster065 | 75Cluster065 | GMYC281 | PTP039 | H393 |
| BT_0228_Cassidinae sp. 7    | Cassidinae sp. 7    | Network245 | 3Cluster065 | 5Cluster066 | 75Cluster066 | GMYC276 | PTP042 | H370 |
| BT_0231_Hispinae sp. 3      | Hispinae sp. 3      | Network247 | 3Cluster066 | 5Cluster067 | 75Cluster067 | GMYC272 | PTP050 | H372 |
| BT_0232_Hispinae sp. 4      | Hispinae sp. 4      | Network1   | 3Cluster067 | 5Cluster068 | 75Cluster068 | GMYC288 | PTP033 | H001 |
| BT_0233_Alticinae sp. 61    | Alticinae sp. 61    | Network8   | 3Cluster068 | 5Cluster069 | 75Cluster069 | GMYC259 | PTP066 | H008 |
| BT_0234_Alticinae sp. 97    | Alticinae sp. 97    | Network13  | 3Cluster035 | 5Cluster036 | 75Cluster036 | GMYC258 | PTP065 | H019 |
| BT_0235_Alticinae sp. 10    | Alticinae sp. 10    | Network195 | 3Cluster021 | 5Cluster022 | 75Cluster022 | GMYC097 | PTP195 | H302 |
| BT_0236_Alticinae sp. 156   | Alticinae sp. 156   | Network194 | 3Cluster069 | 5Cluster070 | 75Cluster022 | GMYC098 | PTP194 | H301 |
| BT_0239_Galerucinae sp. 2   | Galerucinae sp. 2   | Network112 | 3Cluster011 | 5Cluster012 | 75Cluster012 | GMYC138 | PTP264 | H174 |
| BT_0240_Eumolpinae sp. 21   | Eumolpinae sp. 21   | Network270 | 3Cluster007 | 5Cluster007 | 75Cluster007 | GMYC022 | PTP067 | H402 |
| BT_0243_Alticinae sp. 118   | Alticinae sp. 118   | Network170 | 3Cluster053 | 5Cluster054 | 75Cluster054 | GMYC187 | PTP108 | H261 |
| BT_0244_Alticinae sp. 97    | Alticinae sp. 97    | Network13  | 3Cluster035 | 5Cluster036 | 75Cluster036 | GMYC258 | PTP065 | H019 |
| BT_0245_Galerucinae sp. 34  | Galerucinae sp. 34  | Network183 | 3Cluster037 | 5Cluster038 | 75Cluster038 | GMYC103 | PTP232 | H280 |
| BT_0246_Galerucinae sp. 30  | Galerucinae sp. 30  | Network184 | 3Cluster070 | 5Cluster071 | 75Cluster070 | GMYC110 | PTP240 | H282 |
| BT_0247_Criocerinae sp. 1   | Criocerinae sp. 1   | Network237 | 3Cluster071 | 5Cluster072 | 75Cluster071 | GMYC264 | PTP057 | H358 |
| BT_0249_Criocerinae sp. 1   | Criocerinae sp. 1   | Network237 | 3Cluster071 | 5Cluster072 | 75Cluster071 | GMYC264 | PTP057 | H358 |
| BT_0252_Galerucinae sp. 34  | Galerucinae sp. 34  | Network183 | 3Cluster037 | 5Cluster038 | 75Cluster038 | GMYC103 | PTP232 | H280 |
| BT_0254_Eumolpinae sp. 23   | Eumolpinae sp. 23   | Network270 | 3Cluster007 | 5Cluster007 | 75Cluster007 | GMYC022 | PTP007 | H402 |
| BT_0256_Alticinae sp. 31    | Alticinae sp. 31    | Network151 | 3Cluster072 | 5Cluster073 | 75Cluster072 | GMYC241 | PTP083 | H234 |
| BT_0257_Galerucinae sp. 1   | Galerucinae sp. 1   | Network112 | 3Cluster011 | 5Cluster012 | 75Cluster012 | GMYC138 | PTP264 | H177 |
| BT_0258_Galerucinae sp. 5   | Galerucinae sp. 5   | Network110 | 3Cluster016 | 5Cluster017 | 75Cluster017 | GMYC137 | PTP265 | H172 |
| BT_0259_Alticinae sp. 96    | Alticinae sp. 96    | Network85  | 3Cluster044 | 5Cluster045 | 75Cluster045 | GMYC051 | PTP169 | H131 |
| BT_0267_Alticinae sp. 29    | Alticinae sp. 29    | Network68  | 3Cluster042 | 5Cluster043 | 75Cluster043 | GMYC049 | PTP168 | H108 |
| BT_0268_Alticinae sp. 158   | Alticinae sp. 158   | Network127 | 3Cluster073 | 5Cluster074 | 75Cluster073 | GMYC165 | PTP179 | H200 |
| BT_0269_Alticinae sp. 86    | Alticinae sp. 86    | Network48  | 3Cluster074 | 5Cluster075 | 75Cluster074 | GMYC216 | PTP105 | H076 |
| BT_0271_Alticinae sp. 64    | Alticinae sp. 64    | Network71  | 3Cluster075 | 5Cluster076 | 75Cluster075 | GMYC044 | PTP153 | H112 |
| BT_0273_Alticinae sp. 141   | Alticinae sp. 141   | Network130 | 3Cluster076 | 5Cluster077 | 75Cluster076 | GMYC170 | PTP192 | H203 |
| BT_0276_Alticinae sp. 122   | Alticinae sp. 122   | Network218 | 3Cluster033 | 5Cluster034 | 75Cluster034 | GMYC062 | PTP141 | H332 |
| BT_0278_Alticinae sp. 124   | Alticinae sp. 124   | Network87  | 3Cluster032 | 5Cluster033 | 75Cluster033 | GMYC048 | PTP166 | H133 |
| BT_0279_Alticinae sp. 115   | Alticinae sp. 115   | Network10  | 3Cluster030 | 5Cluster031 | 75Cluster031 | GMYC253 | PTP060 | H010 |
| BT_0283_Eumolpinae sp. 20   | Eumolpinae sp. 20   | Network289 | 3Cluster077 | 5Cluster078 | 75Cluster077 | GMYC003 | PTP010 | H425 |
| BT_0284_Alticinae sp. 87    | Alticinae sp. 87    | Network88  | 3Cluster028 | 5Cluster029 | 75Cluster029 | GMYC061 | PTP164 | H137 |
| BT_0285_Galerucinae sp. 22  | Galerucinae sp. 22  | Network117 | 3Cluster078 | 5Cluster008 | 75Cluster008 | GMYC114 | PTP287 | H182 |
| BT_0288_Eumolpinae sp. 17   | Eumolpinae sp. 17   | Network277 | 3Cluster079 | 5Cluster079 | 75Cluster078 | GMYC018 | PTP027 | H409 |
| BT_0289_Eumolpinae sp. 1    | Eumolpinae sp. 1    | Network282 | 3Cluster001 | 5Cluster001 | 75Cluster001 | GMYC008 | PTP023 | H416 |
| BT_0292_Galerucinae sp. 76  | Galerucinae sp. 76  | Network118 | 3Cluster008 | 5Cluster008 | 75Cluster008 | GMYC113 | PTP288 | H183 |
| BT_0295_Galerucinae sp. 31  | Galerucinae sp. 31  | Network203 | 3Cluster061 | 5Cluster062 | 75Cluster062 | GMYC084 | PTP217 | H314 |
| BT_0296_Alticinae sp. 5     | Alticinae sp. 5     | Network162 | 3Cluster080 | 5Cluster080 | 75Cluster079 | GMYC092 | PTP205 | H252 |
| BT_0297_Alticinae sp. 142   | Alticinae sp. 142   | Network132 | 3Cluster081 | 5Cluster081 | 75Cluster080 | GMYC167 | PTP189 | H205 |
| BT_0298_Alticinae sp. 63    | Alticinae sp. 63    | Network26  | 3Cluster082 | 5Cluster082 | 75Cluster081 | GMYC201 | PTP131 | H038 |
| BT_0301_Alticinae sp. 83    | Alticinae sp. 83    | Network22  | 3Cluster083 | 5Cluster083 | 75Cluster082 | GMYC230 | PTP072 | H033 |
| BT_0302_Alticinae sp. 86    | Alticinae sp. 86    | Network48  | 3Cluster074 | 5Cluster075 | 75Cluster074 | GMYC216 | PTP105 | H078 |
| BT_0305_Alticinae sp. 81    | Alticinae sp. 81    | Network209 | 3Cluster084 | 5Cluster084 | 75Cluster083 | GMYC069 | PTP143 | H322 |
| BT_0307_Alticinae sp. 115   | Alticinae sp. 115   | Network10  | 3Cluster030 | 5Cluster031 | 75Cluster031 | GMYC253 | PTP060 | H012 |
| BT_0309_Alticinae sp. 256   | Alticinae sp. 256   | Network12  | 3Cluster085 | 5Cluster085 | 75Cluster084 | GMYC257 | PTP063 | H016 |
| BT_0311_Eumolpinae sp. 42   | Eumolpinae sp. 42   | Network257 | 3Cluster003 | 5Cluster003 | 75Cluster003 | GMYC001 | PTP003 | H388 |
| BT_0312_Eumolpinae sp. 21   | Eumolpinae sp. 21   | Network270 | 3Cluster007 | 5Cluster007 | 75Cluster007 | GMYC022 | PTP007 | H402 |
| BT_0314_Eumolpinae sp. 43   | Eumolpinae sp. 43   | Network234 | 3Cluster086 | 5Cluster086 | 75Cluster085 | GMYC020 | PTP009 | H355 |
| BT_0336_Galerucinae sp. 56  | Galerucinae sp. 56  | Network201 | 3Cluster087 | 5Cluster087 | 75Cluster086 | GMYC107 | PTP231 | H310 |
| BT_0337_Galerucinae sp. 56  | Galerucinae sp. 56  | Network201 | 3Cluster087 | 5Cluster087 | 75Cluster086 | GMYC107 | PTP231 | H310 |

|                             |                     |            |             |             |              |         |        |      |
|-----------------------------|---------------------|------------|-------------|-------------|--------------|---------|--------|------|
| BT_0338_Galerucinae sp. 55  | Galerucinae sp. 55  | Network201 | 3Cluster087 | 5Cluster087 | 75Cluster086 | GMYC107 | PTP231 | H310 |
| BT_0339_Alticinae sp. 71    | Alticinae sp. 71    | Network18  | 3Cluster088 | 5Cluster088 | 75Cluster087 | GMYC195 | PTP112 | H029 |
| BT_0343_Galerucinae sp. 52  | Galerucinae sp. 52  | Network201 | 3Cluster087 | 5Cluster087 | 75Cluster086 | GMYC107 | PTP231 | H310 |
| BT_0346_Alticinae sp. 51    | Alticinae sp. 51    | Network41  | 3Cluster089 | 5Cluster089 | 75Cluster088 | GMYC197 | PTP126 | H058 |
| BT_0349_Eumolpinae sp. 20   | Eumolpinae sp. 20   | Network288 | 3Cluster090 | 5Cluster090 | 75Cluster089 | GMYC004 | PTP011 | H424 |
| BT_0352_Alticinae sp. 130   | Alticinae sp. 130   | Network213 | 3Cluster091 | 5Cluster091 | 75Cluster090 | GMYC063 | PTP139 | H326 |
| BT_0353_Alticinae sp. 132   | Alticinae sp. 132   | Network196 | 3Cluster092 | 5Cluster092 | 75Cluster091 | GMYC212 | PTP101 | H305 |
| BT_0356_Alticinae sp. 128   | Alticinae sp. 128   | Network91  | 3Cluster093 | 5Cluster093 | 75Cluster092 | GMYC055 | PTP160 | H144 |
| BT_0361_Alticinae sp. 50    | Alticinae sp. 50    | Network45  | 3Cluster094 | 5Cluster094 | 75Cluster093 | GMYC211 | PTP107 | H066 |
| BT_0363_Alticinae sp. 51    | Alticinae sp. 51    | Network41  | 3Cluster089 | 5Cluster089 | 75Cluster088 | GMYC197 | PTP126 | H059 |
| BT_0365_Galerucinae sp. 49  | Galerucinae sp. 49  | Network160 | 3Cluster095 | 5Cluster095 | 75Cluster094 | GMYC183 | PTP246 | H247 |
| BT_0372_Alticinae sp. 9     | Alticinae sp. 9     | Network192 | 3Cluster096 | 5Cluster096 | 75Cluster095 | GMYC099 | PTP196 | H297 |
| BT_0375_Eumolpinae sp. 32   | Eumolpinae sp. 32   | Network272 | 3Cluster097 | 5Cluster097 | 75Cluster096 | GMYC007 | PTP014 | H404 |
| BT_0376_Alticinae sp. 51    | Alticinae sp. 51    | Network41  | 3Cluster089 | 5Cluster089 | 75Cluster088 | GMYC197 | PTP126 | H058 |
| BT_0377_Eumolpinae sp. 24   | Eumolpinae sp. 24   | Network279 | 3Cluster098 | 5Cluster098 | 75Cluster097 | GMYC014 | PTP021 | H412 |
| BT_0380_Eumolpinae sp. 24   | Eumolpinae sp. 24   | Network279 | 3Cluster098 | 5Cluster098 | 75Cluster097 | GMYC014 | PTP021 | H413 |
| BT_0382_Galerucinae sp. 13  | Galerucinae sp. 13  | Network105 | 3Cluster099 | 5Cluster099 | 75Cluster098 | GMYC144 | PTP259 | H164 |
| BT_0383_Alticinae sp. 87    | Alticinae sp. 87    | Network88  | 3Cluster028 | 5Cluster029 | 75Cluster029 | GMYC061 | PTP164 | H138 |
| BT_0384_Eumolpinae sp. 39   | Eumolpinae sp. 39   | Network267 | 3Cluster100 | 5Cluster100 | 75Cluster099 | GMYC025 | PTP028 | H398 |
| BT_0387_Alticinae sp. 104   | Alticinae sp. 104   | Network17  | 3Cluster101 | 5Cluster101 | 75Cluster100 | GMYC235 | PTP080 | H027 |
| BT_0390_Alticinae sp. 90    | Alticinae sp. 90    | Network76  | 3Cluster102 | 5Cluster102 | 75Cluster101 | GMYC041 | PTP149 | H118 |
| BT_0391_Alticinae sp. 90    | Alticinae sp. 90    | Network77  | 3Cluster103 | 5Cluster102 | 75Cluster101 | GMYC040 | PTP150 | H119 |
| BT_0392_Eumolpinae sp. 074  | Eumolpinae sp. 074  | Network244 | 3Cluster062 | 5Cluster063 | 75Cluster063 | GMYC031 | PTP002 | H368 |
| BT_0395_Eumolpinae sp. 074  | Eumolpinae sp. 074  | Network244 | 3Cluster062 | 5Cluster063 | 75Cluster063 | GMYC031 | PTP002 | H368 |
| BT_0396_Cassidinae sp. 4    | Cassidinae sp. 4    | Network253 | 3Cluster038 | 5Cluster039 | 75Cluster039 | GMYC284 | PTP053 | H379 |
| BT_0397_Alticinae sp. 131   | Alticinae sp. 131   | Network164 | 3Cluster104 | 5Cluster103 | 75Cluster102 | GMYC237 | PTP077 | H254 |
| BT_0399_Galerucinae sp. 28  | Galerucinae sp. 28  | Network64  | 3Cluster105 | 5Cluster104 | 75Cluster103 | GMYC128 | PTP283 | H102 |
| BT_0402_Galerucinae sp. 44  | Galerucinae sp. 44  | Network139 | 3Cluster106 | 5Cluster105 | 75Cluster104 | GMYC176 | PTP248 | H214 |
| BT_0403_Galerucinae sp. 44  | Galerucinae sp. 44  | Network139 | 3Cluster106 | 5Cluster105 | 75Cluster104 | GMYC176 | PTP248 | H215 |
| BT_0405_Galerucinae sp. 45  | Galerucinae sp. 45  | Network154 | 3Cluster107 | 5Cluster106 | 75Cluster105 | GMYC177 | PTP251 | H239 |
| BT_0407_Galerucinae sp. 049 | Galerucinae sp. 049 | Network158 | 3Cluster108 | 5Cluster107 | 75Cluster106 | GMYC182 | PTP244 | H244 |
| BT_0408_Eumolpinae sp. 24   | Eumolpinae sp. 24   | Network279 | 3Cluster098 | 5Cluster098 | 75Cluster097 | GMYC014 | PTP021 | H412 |
| BT_0409_Eumolpinae sp. 24   | Eumolpinae sp. 24   | Network279 | 3Cluster098 | 5Cluster098 | 75Cluster097 | GMYC014 | PTP021 | H412 |
| BT_0410_Alticinae sp. 141   | Alticinae sp. 141   | Network214 | 3Cluster109 | 5Cluster108 | 75Cluster107 | GMYC171 | PTP182 | H327 |
| BT_0411_Alticinae sp. 58    | Alticinae sp. 58    | Network30  | 3Cluster110 | 5Cluster109 | 75Cluster108 | GMYC248 | PTP094 | H044 |
| BT_0415_Alticinae sp. 242   | Alticinae sp. 242   | Network143 | 3Cluster111 | 5Cluster110 | 75Cluster109 | GMYC033 | PTP086 | H221 |
| BT_0417_Galerucinae sp. 74  | Galerucinae sp. 74  | Network226 | 3Cluster112 | 5Cluster111 | 75Cluster110 | GMYC083 | PTP218 | H345 |
| BT_0420_Alticinae sp. 128   | Alticinae sp. 128   | Network89  | 3Cluster113 | 5Cluster112 | 75Cluster111 | GMYC054 | PTP163 | H141 |
| BT_0423_Eumolpinae sp. 24   | Eumolpinae sp. 24   | Network279 | 3Cluster098 | 5Cluster098 | 75Cluster097 | GMYC014 | PTP021 | H412 |
| BT_0425_Eumolpinae sp. 7    | Eumolpinae sp. 7    | Network264 | 3Cluster114 | 5Cluster113 | 75Cluster112 | GMYC012 | PTP019 | H395 |
| BT_0426_Alticinae sp. 150   | Alticinae sp. 150   | Network191 | 3Cluster115 | 5Cluster011 | 75Cluster011 | GMYC088 | PTP203 | H291 |
| BT_0427_Alticinae sp. 104   | Alticinae sp. 104   | Network17  | 3Cluster101 | 5Cluster101 | 75Cluster100 | GMYC235 | PTP080 | H026 |
| BT_0428_Alticinae sp. 105   | Alticinae sp. 105   | Network16  | 3Cluster116 | 5Cluster114 | 75Cluster113 | GMYC234 | PTP079 | H024 |
| BT_0429_Eumolpinae sp. 39   | Eumolpinae sp. 39   | Network267 | 3Cluster100 | 5Cluster100 | 75Cluster099 | GMYC025 | PTP028 | H398 |
| BT_0432_Eumolpinae sp. 30   | Eumolpinae sp. 30   | Network271 | 3Cluster117 | 5Cluster115 | 75Cluster114 | GMYC019 | PTP024 | H403 |
| BT_0433_Galerucinae sp. 69  | Galerucinae sp. 69  | Network219 | 3Cluster057 | 5Cluster058 | 75Cluster058 | GMYC086 | PTP215 | H335 |
| BT_0434_Galerucinae sp. 72  | Galerucinae sp. 72  | Network231 | 3Cluster118 | 5Cluster116 | 75Cluster115 | GMYC073 | PTP225 | H351 |
| BT_0436_Alticinae sp. 149   | Alticinae sp. 149   | Network188 | 3Cluster119 | 5Cluster117 | 75Cluster116 | GMYC091 | PTP200 | H286 |
| BT_0438_Galerucinae sp. 15  | Galerucinae sp. 15  | Network202 | 3Cluster120 | 5Cluster118 | 75Cluster117 | GMYC105 | PTP234 | H311 |
| BT_0441_Galerucinae sp. 082 | Galerucinae sp. 082 | Network182 | 3Cluster121 | 5Cluster119 | 75Cluster118 | GMYC106 | PTP235 | H279 |
| BT_0442_Galerucinae sp. 049 | Galerucinae sp. 049 | Network160 | 3Cluster095 | 5Cluster095 | 75Cluster094 | GMYC183 | PTP246 | H247 |
| BT_0443_Alticinae sp. 51    | Alticinae sp. 51    | Network41  | 3Cluster089 | 5Cluster089 | 75Cluster088 | GMYC197 | PTP126 | H058 |
| BT_0444_Alticinae sp. 143   | Alticinae sp. 143   | Network123 | 3Cluster122 | 5Cluster120 | 75Cluster119 | GMYC158 | PTP186 | H193 |
| BT_0447_Galerucinae sp. 7   | Galerucinae sp. 7   | Network109 | 3Cluster019 | 5Cluster020 | 75Cluster020 | GMYC134 | PTP267 | H168 |
| BT_0448_Galerucinae sp. 049 | Galerucinae sp. 049 | Network160 | 3Cluster095 | 5Cluster095 | 75Cluster094 | GMYC183 | PTP246 | H247 |
| BT_0449_Galerucinae sp. 049 | Galerucinae sp. 049 | Network160 | 3Cluster095 | 5Cluster095 | 75Cluster094 | GMYC183 | PTP246 | H248 |
| BT_0451_Galerucinae sp. 15  | Galerucinae sp. 15  | Network202 | 3Cluster120 | 5Cluster118 | 75Cluster117 | GMYC105 | PTP234 | H311 |
| BT_0452_Alticinae sp. 9     | Alticinae sp. 9     | Network192 | 3Cluster096 | 5Cluster096 | 75Cluster095 | GMYC099 | PTP196 | H296 |
| BT_0454_Alticinae sp. 26    | Alticinae sp. 26    | Network50  | 3Cluster123 | 5Cluster121 | 75Cluster120 | GMYC213 | PTP103 | H082 |
| BT_0457_Alticinae sp. 181   | Alticinae sp. 181   | Network5   | 3Cluster124 | 5Cluster122 | 75Cluster121 | GMYC193 | PTP212 | H005 |
| BT_0459_Galerucinae sp. 50  | Galerucinae sp. 50  | Network61  | 3Cluster125 | 5Cluster123 | 75Cluster122 | GMYC127 | PTP280 | H097 |
| BT_0460_Galerucinae sp. 45  | Galerucinae sp. 45  | Network154 | 3Cluster107 | 5Cluster106 | 75Cluster105 | GMYC177 | PTP251 | H238 |
| BT_0461_Galerucinae sp. 45  | Galerucinae sp. 45  | Network154 | 3Cluster107 | 5Cluster106 | 75Cluster105 | GMYC177 | PTP251 | H237 |
| BT_0462_Eumolpinae sp. 42   | Eumolpinae sp. 42   | Network257 | 3Cluster003 | 5Cluster003 | 75Cluster003 | GMYC001 | PTP003 | H384 |
| BT_0463_Galerucinae sp. 70  | Galerucinae sp. 70  | Network229 | 3Cluster126 | 5Cluster124 | 75Cluster123 | GMYC081 | PTP229 | H349 |
| BT_0465_Alticinae sp. 050   | Alticinae sp. 050   | Network45  | 3Cluster094 | 5Cluster094 | 75Cluster093 | GMYC211 | PTP107 | H066 |
| BT_0468_Alticinae sp. 72    | Alticinae sp. 72    | Network149 | 3Cluster127 | 5Cluster125 | 75Cluster124 | GMYC240 | PTP082 | H230 |
| BT_0469_Galerucinae sp. 45  | Galerucinae sp. 45  | Network154 | 3Cluster107 | 5Cluster106 | 75Cluster105 | GMYC177 | PTP251 | H240 |
| BT_0473_Galerucinae sp. 69  | Galerucinae sp. 69  | Network219 | 3Cluster057 | 5Cluster058 | 75Cluster058 | GMYC086 | PTP215 | H334 |

|                            |                    |            |             |             |              |         |        |      |
|----------------------------|--------------------|------------|-------------|-------------|--------------|---------|--------|------|
| BT_0474_Alticinae sp. 80   | Alticinae sp. 80   | Network146 | 3Cluster128 | 5Cluster126 | 75Cluster125 | GMYC156 | PTP171 | H225 |
| BT_0475_Eumolpinae sp. 39  | Eumolpinae sp. 39  | Network267 | 3Cluster100 | 5Cluster100 | 75Cluster099 | GMYC025 | PTP028 | H398 |
| BT_0489_Galerucinae sp. 67 | Galerucinae sp. 67 | Network228 | 3Cluster129 | 5Cluster127 | 75Cluster126 | GMYC085 | PTP216 | H348 |
| BT_0490_Hispinae sp. 5     | Hispinae sp. 5     | Network246 | 3Cluster130 | 5Cluster128 | 75Cluster127 | GMYC287 | PTP034 | H371 |
| BT_0491_Alticinae sp. 157  | Alticinae sp. 157  | Network135 | 3Cluster131 | 5Cluster129 | 75Cluster128 | GMYC169 | PTP190 | H209 |
| BT_0492_Galerucinae sp. 61 | Galerucinae sp. 61 | Network93  | 3Cluster041 | 5Cluster042 | 75Cluster042 | GMYC131 | PTP279 | H149 |
| BT_0494_Alticinae sp. 250  | Alticinae sp. 250  | Network74  | 3Cluster132 | 5Cluster130 | 75Cluster129 | GMYC039 | PTP146 | H115 |
| BT_0496_Alticinae sp. 112  | Alticinae sp. 112  | Network220 | 3Cluster133 | 5Cluster131 | 75Cluster130 | GMYC071 | PTP214 | H336 |
| BT_0499_Alticinae sp. 44   | Alticinae sp. 44   | Network42  | 3Cluster024 | 5Cluster025 | 75Cluster025 | GMYC214 | PTP102 | H060 |
| BT_0501_Galerucinae sp. 66 | Galerucinae sp. 66 | Network223 | 3Cluster059 | 5Cluster060 | 75Cluster060 | GMYC079 | PTP222 | H341 |
| BT_0502_Eumolpinae sp. 42  | Eumolpinae sp. 42  | Network257 | 3Cluster003 | 5Cluster003 | 75Cluster003 | GMYC001 | PTP003 | H388 |
| BT_0503_Alticinae sp. 111  | Alticinae sp. 111  | Network137 | 3Cluster134 | 5Cluster132 | 75Cluster131 | GMYC192 | PTP213 | H212 |
| BT_0505_Alticinae sp. 96   | Alticinae sp. 96   | Network85  | 3Cluster044 | 5Cluster045 | 75Cluster045 | GMYC051 | PTP169 | H131 |
| BT_0506_Alticinae sp. 92   | Alticinae sp. 92   | Network200 | 3Cluster135 | 5Cluster133 | 75Cluster132 | GMYC191 | PTP208 | H309 |
| BT_0508_Galerucinae sp. 53 | Galerucinae sp. 53 | Network205 | 3Cluster029 | 5Cluster030 | 75Cluster030 | GMYC111 | PTP239 | H317 |
| BT_0510_Cassidinae sp. 4   | Cassidinae sp. 4   | Network253 | 3Cluster038 | 5Cluster039 | 75Cluster039 | GMYC284 | PTP053 | H379 |
| BT_0511_Cassidinae sp. 8   | Cassidinae sp. 8   | Network241 | 3Cluster136 | 5Cluster134 | 75Cluster133 | GMYC286 | PTP032 | H363 |
| BT_0512_Hispinae sp. 6     | Hispinae sp. 6     | Network251 | 3Cluster137 | 5Cluster135 | 75Cluster134 | GMYC269 | PTP048 | H376 |
| BT_0514_Eumolpinae sp. 074 | Eumolpinae sp. 074 | Network244 | 3Cluster062 | 5Cluster063 | 75Cluster063 | GMYC031 | PTP002 | H368 |
| BT_0516_Alticinae sp. 126  | Alticinae sp. 126  | Network220 | 3Cluster133 | 5Cluster131 | 75Cluster130 | GMYC071 | PTP214 | H336 |
| BT_0517_Alticinae sp. 104  | Alticinae sp. 104  | Network17  | 3Cluster101 | 5Cluster101 | 75Cluster100 | GMYC235 | PTP080 | H027 |
| BT_0518_Alticinae sp. 85   | Alticinae sp. 85   | Network47  | 3Cluster138 | 5Cluster136 | 75Cluster135 | GMYC217 | PTP104 | H071 |
| BT_0519_Alticinae sp. 68   | Alticinae sp. 68   | Network84  | 3Cluster139 | 5Cluster137 | 75Cluster136 | GMYC052 | PTP162 | H127 |
| BT_0520_Alticinae sp. 159  | Alticinae sp. 159  | Network133 | 3Cluster140 | 5Cluster138 | 75Cluster137 | GMYC164 | PTP180 | H207 |
| BT_0524_Eumolpinae sp. 39  | Eumolpinae sp. 39  | Network268 | 3Cluster141 | 5Cluster139 | 75Cluster099 | GMYC026 | PTP029 | H399 |
| BT_0525_Hispinae sp. 023   | Hispinae sp. 023   | Network248 | 3Cluster142 | 5Cluster140 | 75Cluster067 | GMYC271 | PTP049 | H373 |
| BT_0526_Eumolpinae sp. 39  | Eumolpinae sp. 39  | Network267 | 3Cluster100 | 5Cluster100 | 75Cluster099 | GMYC025 | PTP028 | H398 |
| BT_0527_Galerucinae sp. 36 | Galerucinae sp. 36 | Network208 | 3Cluster143 | 5Cluster141 | 75Cluster138 | GMYC146 | PTP254 | H320 |
| BT_0528_Alticinae sp. 150  | Alticinae sp. 150  | Network191 | 3Cluster115 | 5Cluster011 | 75Cluster011 | GMYC088 | PTP203 | H290 |
| BT_0529_Alticinae sp. 113  | Alticinae sp. 113  | Network204 | 3Cluster144 | 5Cluster142 | 75Cluster139 | GMYC064 | PTP140 | H316 |
| BT_0530_Galerucinae sp. 31 | Galerucinae sp. 31 | Network203 | 3Cluster061 | 5Cluster062 | 75Cluster062 | GMYC084 | PTP217 | H312 |
| BT_0531_Galerucinae sp. 62 | Galerucinae sp. 62 | Network205 | 3Cluster029 | 5Cluster030 | 75Cluster030 | GMYC111 | PTP239 | H317 |
| BT_0532_Galerucinae sp. 75 | Galerucinae sp. 75 | Network227 | 3Cluster145 | 5Cluster143 | 75Cluster110 | GMYC082 | PTP219 | H346 |
| BT_0533_Alticinae sp. 97   | Alticinae sp. 97   | Network13  | 3Cluster035 | 5Cluster036 | 75Cluster036 | GMYC258 | PTP065 | H017 |
| BT_0535_Alticinae sp. 97   | Alticinae sp. 97   | Network13  | 3Cluster035 | 5Cluster036 | 75Cluster036 | GMYC258 | PTP065 | H019 |
| BT_0537_Alticinae sp. 142  | Alticinae sp. 142  | Network132 | 3Cluster081 | 5Cluster081 | 75Cluster080 | GMYC167 | PTP189 | H205 |
| BT_0538_Alticinae sp. 238  | Alticinae sp. 238  | Network176 | 3Cluster146 | 5Cluster144 | 75Cluster140 | GMYC189 | PTP210 | H273 |
| BT_0539_Alticinae sp. 13   | Alticinae sp. 13   | Network175 | 3Cluster147 | 5Cluster156 | 75Cluster141 | GMYC066 | PTP090 | H271 |
| BT_0540_Galerucinae sp. 64 | Galerucinae sp. 64 | Network222 | 3Cluster148 | 5Cluster145 | 75Cluster060 | GMYC080 | PTP221 | H339 |
| BT_0544_Cassidinae sp. 12  | Cassidinae sp. 12  | Network243 | 3Cluster149 | 5Cluster146 | 75Cluster142 | GMYC278 | PTP044 | H366 |
| BT_0546_Alticinae sp. 83   | Alticinae sp. 83   | Network22  | 3Cluster083 | 5Cluster083 | 75Cluster082 | GMYC230 | PTP072 | H034 |
| BT_0547_Alticinae sp. 96   | Alticinae sp. 96   | Network85  | 3Cluster044 | 5Cluster045 | 75Cluster045 | GMYC051 | PTP169 | H131 |
| BT_0549_Alticinae sp. 150  | Alticinae sp. 150  | Network191 | 3Cluster115 | 5Cluster011 | 75Cluster011 | GMYC088 | PTP203 | H292 |
| BT_0550_Alticinae sp. 265  | Alticinae sp. 265  | Network60  | 3Cluster150 | 5Cluster147 | 75Cluster143 | GMYC068 | PTP142 | H096 |
| BT_0551_Galerucinae sp. 64 | Galerucinae sp. 64 | Network222 | 3Cluster148 | 5Cluster145 | 75Cluster060 | GMYC080 | PTP221 | H339 |
| BT_0552_Alticinae sp. 117  | Alticinae sp. 117  | Network87  | 3Cluster032 | 5Cluster033 | 75Cluster033 | GMYC048 | PTP166 | H133 |
| BT_0553_Eumolpinae sp. 42  | Eumolpinae sp. 42  | Network257 | 3Cluster003 | 5Cluster003 | 75Cluster003 | GMYC001 | PTP003 | H388 |
| BT_0554_Galerucinae sp. 71 | Galerucinae sp. 71 | Network233 | 3Cluster151 | 5Cluster148 | 75Cluster053 | GMYC075 | PTP227 | H354 |
| BT_0555_Alticinae sp. 86   | Alticinae sp. 86   | Network48  | 3Cluster074 | 5Cluster075 | 75Cluster074 | GMYC216 | PTP105 | H078 |
| BT_0556_Alticinae sp. 96   | Alticinae sp. 96   | Network85  | 3Cluster044 | 5Cluster045 | 75Cluster045 | GMYC051 | PTP169 | H131 |
| BT_0557_Alticinae sp. 181  | Alticinae sp. 181  | Network220 | 3Cluster133 | 5Cluster131 | 75Cluster130 | GMYC071 | PTP214 | H336 |
| BT_0558_Alticinae sp. 149  | Alticinae sp. 149  | Network191 | 3Cluster115 | 5Cluster011 | 75Cluster011 | GMYC088 | PTP203 | H293 |
| BT_0559_Eumolpinae sp. 42  | Eumolpinae sp. 42  | Network257 | 3Cluster003 | 5Cluster003 | 75Cluster003 | GMYC001 | PTP003 | H388 |
| BT_0560_Galerucinae sp. 64 | Galerucinae sp. 64 | Network222 | 3Cluster148 | 5Cluster145 | 75Cluster060 | GMYC080 | PTP221 | H339 |
| BT_0561_Galerucinae sp. 66 | Galerucinae sp. 66 | Network224 | 3Cluster152 | 5Cluster149 | 75Cluster060 | GMYC077 | PTP224 | H343 |
| BT_0565_Alticinae sp. 150  | Alticinae sp. 150  | Network191 | 3Cluster115 | 5Cluster011 | 75Cluster011 | GMYC088 | PTP203 | H289 |
| BT_0566_Hispinae sp. 6     | Hispinae sp. 6     | Network251 | 3Cluster137 | 5Cluster135 | 75Cluster134 | GMYC269 | PTP048 | H377 |
| BT_0567_Alticinae sp. 104  | Alticinae sp. 104  | Network17  | 3Cluster101 | 5Cluster101 | 75Cluster100 | GMYC235 | PTP080 | H027 |
| BT_0574_Eumolpinae sp. 39  | Eumolpinae sp. 39  | Network267 | 3Cluster100 | 5Cluster100 | 75Cluster099 | GMYC025 | PTP028 | H398 |
| BT_0575_Alticinae sp. 140  | Alticinae sp. 140  | Network122 | 3Cluster153 | 5Cluster150 | 75Cluster144 | GMYC157 | PTP187 | H191 |
| BT_0577_Eumolpinae sp. 39  | Eumolpinae sp. 39  | Network267 | 3Cluster100 | 5Cluster100 | 75Cluster099 | GMYC025 | PTP028 | H398 |
| BT_0579_Alticinae sp. 104  | Alticinae sp. 104  | Network17  | 3Cluster101 | 5Cluster101 | 75Cluster100 | GMYC235 | PTP080 | H027 |
| BT_0587_Alticinae sp. 6    | Alticinae sp. 6    | Network128 | 3Cluster154 | 5Cluster151 | 75Cluster145 | GMYC153 | PTP099 | H201 |
| BT_0588_Galerucinae sp. 69 | Galerucinae sp. 69 | Network219 | 3Cluster057 | 5Cluster058 | 75Cluster058 | GMYC086 | PTP215 | H335 |
| BT_0589_Eumolpinae sp. 17  | Eumolpinae sp. 17  | Network277 | 3Cluster079 | 5Cluster079 | 75Cluster078 | GMYC018 | PTP027 | H410 |
| BT_0590_Alticinae sp. 140  | Alticinae sp. 140  | Network122 | 3Cluster153 | 5Cluster150 | 75Cluster144 | GMYC157 | PTP187 | H191 |
| BT_0592_Eumolpinae sp. 39  | Eumolpinae sp. 39  | Network267 | 3Cluster100 | 5Cluster100 | 75Cluster099 | GMYC025 | PTP028 | H398 |
| BT_0594_Alticinae sp. 118  | Alticinae sp. 118  | Network169 | 3Cluster155 | 5Cluster152 | 75Cluster054 | GMYC188 | PTP109 | H260 |
| BT_0596_Eumolpinae sp. 39  | Eumolpinae sp. 39  | Network267 | 3Cluster100 | 5Cluster100 | 75Cluster099 | GMYC025 | PTP028 | H398 |

|                             |                     |            |             |             |              |         |        |      |
|-----------------------------|---------------------|------------|-------------|-------------|--------------|---------|--------|------|
| BT_0597_Alticinae sp. 104   | Alticinae sp. 104   | Network17  | 3Cluster101 | 5Cluster101 | 75Cluster100 | GMYC235 | PTP080 | H027 |
| BT_0604_Hispinae sp. 5      | Hispinae sp. 5      | Network246 | 3Cluster130 | 5Cluster128 | 75Cluster127 | GMYC287 | PTP034 | H371 |
| BT_0605_Alticinae sp. 87    | Alticinae sp. 87    | Network88  | 3Cluster028 | 5Cluster029 | 75Cluster029 | GMYC061 | PTP164 | H136 |
| BT_0606_Eumolpinae sp. 39   | Eumolpinae sp. 39   | Network267 | 3Cluster100 | 5Cluster100 | 75Cluster099 | GMYC025 | PTP068 | H398 |
| BT_0628_Cassidinae sp. 12   | Cassidinae sp. 12   | Network243 | 3Cluster149 | 5Cluster146 | 75Cluster142 | GMYC278 | PTP044 | H366 |
| BT_0630_Alticinae sp. 36    | Alticinae sp. 36    | Network142 | 3Cluster156 | 5Cluster153 | 75Cluster146 | GMYC035 | PTP088 | H220 |
| BT_0631_Alticinae sp. 64    | Alticinae sp. 64    | Network75  | 3Cluster157 | 5Cluster154 | 75Cluster101 | GMYC042 | PTP148 | H116 |
| BT_0632_Alticinae sp. 86    | Alticinae sp. 86    | Network48  | 3Cluster074 | 5Cluster075 | 75Cluster074 | GMYC216 | PTP105 | H075 |
| BT_0633_Alticinae sp. 85    | Alticinae sp. 85    | Network48  | 3Cluster074 | 5Cluster075 | 75Cluster074 | GMYC216 | PTP105 | H078 |
| BT_0634_Alticinae sp. 66    | Alticinae sp. 66    | Network85  | 3Cluster044 | 5Cluster045 | 75Cluster045 | GMYC051 | PTP169 | H131 |
| BT_0635_Alticinae sp. 96    | Alticinae sp. 96    | Network85  | 3Cluster044 | 5Cluster045 | 75Cluster045 | GMYC051 | PTP169 | H131 |
| BT_0640_Alticinae sp. 18    | Alticinae sp. 18    | Network59  | 3Cluster158 | 5Cluster155 | 75Cluster147 | GMYC251 | PTP067 | H095 |
| BT_0641_Alticinae sp. 13    | Alticinae sp. 13    | Network174 | 3Cluster159 | 5Cluster156 | 75Cluster141 | GMYC067 | PTP089 | H269 |
| BT_0642_Eumolpinae sp. 42   | Eumolpinae sp. 42   | Network257 | 3Cluster003 | 5Cluster003 | 75Cluster003 | GMYC001 | PTP003 | H385 |
| BT_0644_Galerucinae sp. 66  | Galerucinae sp. 66  | Network223 | 3Cluster059 | 5Cluster060 | 75Cluster060 | GMYC079 | PTP222 | H342 |
| BT_0645_Galerucinae sp. 11  | Galerucinae sp. 11  | Network113 | 3Cluster160 | 5Cluster157 | 75Cluster148 | GMYC140 | PTP260 | H178 |
| BT_0646_Alticinae sp. 71    | Alticinae sp. 71    | Network44  | 3Cluster161 | 5Cluster158 | 75Cluster149 | GMYC215 | PTP123 | H064 |
| BT_0647_Galerucinae sp. 35  | Galerucinae sp. 35  | Network166 | 3Cluster162 | 5Cluster159 | 75Cluster150 | GMYC109 | PTP241 | H257 |
| BT_0648_Alticinae sp. 140   | Alticinae sp. 140   | Network122 | 3Cluster153 | 5Cluster150 | 75Cluster144 | GMYC157 | PTP187 | H190 |
| BT_0650_Eumolpinae sp. 39   | Eumolpinae sp. 39   | Network267 | 3Cluster100 | 5Cluster100 | 75Cluster099 | GMYC025 | PTP028 | H398 |
| BT_0652_Alticinae sp. 104   | Alticinae sp. 104   | Network17  | 3Cluster101 | 5Cluster101 | 75Cluster100 | GMYC235 | PTP080 | H026 |
| BT_0655_Alticinae sp. 257   | Alticinae sp. 257   | Network73  | 3Cluster163 | 5Cluster160 | 75Cluster151 | GMYC038 | PTP151 | H114 |
| BT_0656_Alticinae sp. 51    | Alticinae sp. 51    | Network31  | 3Cluster164 | 5Cluster161 | 75Cluster152 | GMYC207 | PTP135 | H045 |
| BT_0657_Eumolpinae sp. 39   | Eumolpinae sp. 39   | Network267 | 3Cluster100 | 5Cluster100 | 75Cluster099 | GMYC025 | PTP028 | H398 |
| BT_0660_Alticinae sp. 104   | Alticinae sp. 104   | Network17  | 3Cluster101 | 5Cluster101 | 75Cluster100 | GMYC235 | PTP080 | H027 |
| BT_0662_Alticinae sp. 126   | Alticinae sp. 126   | Network14  | 3Cluster165 | 5Cluster162 | 75Cluster153 | GMYC246 | PTP093 | H022 |
| BT_0663_Alticinae sp. 150   | Alticinae sp. 150   | Network191 | 3Cluster115 | 5Cluster011 | 75Cluster011 | GMYC088 | PTP203 | H289 |
| BT_0664_Alticinae sp. 150   | Alticinae sp. 150   | Network191 | 3Cluster115 | 5Cluster011 | 75Cluster011 | GMYC088 | PTP203 | H295 |
| BT_0665_Alticinae sp. 150   | Alticinae sp. 150   | Network191 | 3Cluster115 | 5Cluster011 | 75Cluster011 | GMYC088 | PTP203 | H292 |
| BT_0675_Alticinae sp. 8     | Alticinae sp. 8     | Network189 | 3Cluster166 | 5Cluster163 | 75Cluster011 | GMYC090 | PTP201 | H287 |
| BT_0676_Alticinae sp. 64    | Alticinae sp. 64    | Network79  | 3Cluster045 | 5Cluster046 | 75Cluster046 | GMYC037 | PTP147 | H122 |
| BT_0677_Eumolpinae sp. 39   | Eumolpinae sp. 39   | Network267 | 3Cluster100 | 5Cluster100 | 75Cluster099 | GMYC025 | PTP028 | H398 |
| BT_0680_Galerucinae sp. 76  | Galerucinae sp. 76  | Network118 | 3Cluster008 | 5Cluster008 | 75Cluster008 | GMYC113 | PTP288 | H185 |
| BT_0683_Alticinae sp. 115   | Alticinae sp. 115   | Network10  | 3Cluster030 | 5Cluster031 | 75Cluster031 | GMYC253 | PTP060 | H013 |
| BT_0686_Eumolpinae sp. 23   | Eumolpinae sp. 23   | Network270 | 3Cluster007 | 5Cluster007 | 75Cluster007 | GMYC022 | PTP007 | H402 |
| BT_0687_Alticinae sp. 87    | Alticinae sp. 87    | Network88  | 3Cluster028 | 5Cluster029 | 75Cluster029 | GMYC061 | PTP164 | H136 |
| BT_0688_Criocerinae sp. 1   | Criocerinae sp. 1   | Network237 | 3Cluster071 | 5Cluster072 | 75Cluster071 | GMYC264 | PTP057 | H359 |
| BT_0690_Alticinae sp. 124   | Alticinae sp. 124   | Network87  | 3Cluster032 | 5Cluster033 | 75Cluster033 | GMYC048 | PTP166 | H134 |
| BT_0691_Galerucinae sp. 31  | Galerucinae sp. 31  | Network203 | 3Cluster061 | 5Cluster062 | 75Cluster062 | GMYC084 | PTP217 | H314 |
| BT_0692_Alticinae sp. 14    | Alticinae sp. 14    | Network131 | 3Cluster167 | 5Cluster164 | 75Cluster154 | GMYC162 | PTP188 | H204 |
| BT_0698_Alticinae sp. 13    | Alticinae sp. 13    | Network174 | 3Cluster159 | 5Cluster156 | 75Cluster141 | GMYC067 | PTP089 | H270 |
| BT_0699_Alticinae sp. 83    | Alticinae sp. 83    | Network22  | 3Cluster083 | 5Cluster083 | 75Cluster082 | GMYC230 | PTP072 | H034 |
| BT_0705_Galerucinae sp. 8   | Galerucinae sp. 8   | Network107 | 3Cluster168 | 5Cluster165 | 75Cluster155 | GMYC136 | PTP266 | H166 |
| BT_0709_Galerucinae sp. 64  | Galerucinae sp. 64  | Network222 | 3Cluster148 | 5Cluster145 | 75Cluster060 | GMYC080 | PTP221 | H339 |
| BT_0710_Alticinae sp. 13    | Alticinae sp. 13    | Network175 | 3Cluster147 | 5Cluster156 | 75Cluster141 | GMYC066 | PTP090 | H272 |
| BT_0711_Galerucinae sp. 73  | Galerucinae sp. 73  | Network221 | 3Cluster169 | 5Cluster166 | 75Cluster156 | GMYC072 | PTP220 | H337 |
| BT_0713_Galerucinae sp. 73  | Galerucinae sp. 73  | Network221 | 3Cluster169 | 5Cluster166 | 75Cluster156 | GMYC072 | PTP220 | H337 |
| BT_0715_Galerucinae sp. 76  | Galerucinae sp. 76  | Network118 | 3Cluster008 | 5Cluster008 | 75Cluster008 | GMYC113 | PTP288 | H185 |
| BT_0716_Galerucinae sp. 11  | Galerucinae sp. 11  | Network103 | 3Cluster015 | 5Cluster016 | 75Cluster016 | GMYC143 | PTP258 | H161 |
| BT_0717_Galerucinae sp. 002 | Galerucinae sp. 002 | Network114 | 3Cluster170 | 5Cluster167 | 75Cluster157 | GMYC141 | PTP262 | H179 |
| BT_0719_Eumolpinae sp. 43   | Eumolpinae sp. 43   | Network234 | 3Cluster086 | 5Cluster086 | 75Cluster085 | GMYC020 | PTP009 | H355 |
| BT_0721_Eumolpinae sp. 20   | Eumolpinae sp. 20   | Network289 | 3Cluster077 | 5Cluster078 | 75Cluster077 | GMYC003 | PTP010 | H426 |
| BT_0722_Cassidinae sp. 13   | Cassidinae sp. 13   | Network235 | 3Cluster171 | 5Cluster168 | 75Cluster158 | GMYC275 | PTP041 | H356 |
| BT_0725_Alticinae sp. 243   | Alticinae sp. 243   | Network53  | 3Cluster006 | 5Cluster006 | 75Cluster006 | GMYC221 | PTP116 | H087 |
| BT_0727_Galerucinae sp. 73  | Galerucinae sp. 73  | Network221 | 3Cluster169 | 5Cluster166 | 75Cluster156 | GMYC072 | PTP220 | H338 |
| BT_0728_Galerucinae sp. 64  | Galerucinae sp. 64  | Network222 | 3Cluster148 | 5Cluster145 | 75Cluster060 | GMYC080 | PTP221 | H339 |
| BT_0729_Galerucinae sp. 15  | Galerucinae sp. 15  | Network202 | 3Cluster120 | 5Cluster118 | 75Cluster117 | GMYC105 | PTP234 | H311 |
| BT_0730_Alticinae sp. 136   | Alticinae sp. 136   | Network165 | 3Cluster172 | 5Cluster169 | 75Cluster159 | GMYC159 | PTP185 | H255 |
| BT_0732_Galerucinae sp. 4   | Galerucinae sp. 4   | Network106 | 3Cluster173 | 5Cluster170 | 75Cluster160 | GMYC145 | PTP257 | H165 |
| BT_0733_Galerucinae sp. 097 | Galerucinae sp. 097 | Network108 | 3Cluster174 | 5Cluster171 | 75Cluster020 | GMYC135 | PTP268 | H167 |
| BT_0734_Galerucinae sp. 39  | Galerucinae sp. 39  | Network97  | 3Cluster017 | 5Cluster018 | 75Cluster018 | GMYC118 | PTP271 | H153 |
| BT_0735_Galerucinae sp. 38  | Galerucinae sp. 38  | Network99  | 3Cluster175 | 5Cluster005 | 75Cluster005 | GMYC116 | PTP273 | H155 |
| BT_0736_Galerucinae sp. 26  | Galerucinae sp. 26  | Network211 | 3Cluster176 | 5Cluster172 | 75Cluster161 | GMYC104 | PTP233 | H324 |
| BT_0738_Eumolpinae sp. 4    | Eumolpinae sp. 4    | Network273 | 3Cluster177 | 5Cluster173 | 75Cluster162 | GMYC024 | PTP005 | H405 |
| BT_0739_Galerucinae sp. 18  | Galerucinae sp. 18  | Network96  | 3Cluster178 | 5Cluster174 | 75Cluster163 | GMYC119 | PTP270 | H152 |
| BT_0740_Galerucinae sp. 76  | Galerucinae sp. 76  | Network118 | 3Cluster008 | 5Cluster008 | 75Cluster008 | GMYC113 | PTP288 | H185 |
| BT_0741_Galerucinae sp. 002 | Galerucinae sp. 002 | Network112 | 3Cluster011 | 5Cluster012 | 75Cluster012 | GMYC138 | PTP264 | H175 |
| BT_0742_Galerucinae sp. 19  | Galerucinae sp. 19  | Network120 | 3Cluster179 | 5Cluster175 | 75Cluster164 | GMYC112 | PTP285 | H187 |
| BT_0743_Galerucinae sp. 14  | Galerucinae sp. 14  | Network102 | 3Cluster180 | 5Cluster176 | 75Cluster165 | GMYC132 | PTP255 | H159 |

|                            |                    |            |             |             |              |         |        |      |
|----------------------------|--------------------|------------|-------------|-------------|--------------|---------|--------|------|
| BT_0744_Galerucinae sp. 7  | Galerucinae sp. 7  | Network109 | 3Cluster019 | 5Cluster020 | 75Cluster020 | GMYC134 | PTP267 | H171 |
| BT_0747_Galerucinae sp. 38 | Galerucinae sp. 38 | Network99  | 3Cluster175 | 5Cluster005 | 75Cluster005 | GMYC116 | PTP273 | H156 |
| BT_0749_Galerucinae sp. 39 | Galerucinae sp. 39 | Network97  | 3Cluster017 | 5Cluster018 | 75Cluster018 | GMYC118 | PTP271 | H153 |
| BT_0750_Cassidinae sp. 5   | Cassidinae sp. 5   | Network242 | 3Cluster058 | 5Cluster059 | 75Cluster059 | GMYC277 | PTP043 | H365 |
| BT_0752_Alticinae sp. 39   | Alticinae sp. 39   | Network163 | 3Cluster181 | 5Cluster177 | 75Cluster166 | GMYC094 | PTP198 | H253 |
| BT_0753_Alticinae sp. 10   | Alticinae sp. 10   | Network195 | 3Cluster021 | 5Cluster022 | 75Cluster022 | GMYC097 | PTP195 | H304 |
| BT_0755_Galerucinae sp. 36 | Galerucinae sp. 36 | Network207 | 3Cluster182 | 5Cluster178 | 75Cluster138 | GMYC147 | PTP253 | H319 |
| BT_0756_Eumolpinae sp. 22  | Eumolpinae sp. 22  | Network269 | 3Cluster183 | 5Cluster179 | 75Cluster167 | GMYC023 | PTP006 | H400 |
| BT_0766_Alticinae sp. 96   | Alticinae sp. 96   | Network85  | 3Cluster044 | 5Cluster045 | 75Cluster045 | GMYC051 | PTP169 | H131 |
| BT_0770_Eumolpinae sp. 16  | Eumolpinae sp. 16  | Network286 | 3Cluster184 | 5Cluster180 | 75Cluster168 | GMYC002 | PTP012 | H422 |
| BT_0779_Alticinae sp. 115  | Alticinae sp. 115  | Network10  | 3Cluster030 | 5Cluster031 | 75Cluster031 | GMYC253 | PTP060 | H010 |
| BT_0781_Eumolpinae sp. 20  | Eumolpinae sp. 20  | Network289 | 3Cluster077 | 5Cluster078 | 75Cluster077 | GMYC003 | PTP010 | H425 |
| BT_0782_Galerucinae sp. 34 | Galerucinae sp. 34 | Network183 | 3Cluster037 | 5Cluster038 | 75Cluster038 | GMYC103 | PTP232 | H280 |
| BT_0788_Alticinae sp. 6    | Alticinae sp. 6    | Network125 | 3Cluster185 | 5Cluster181 | 75Cluster169 | GMYC154 | PTP100 | H198 |
| BT_0789_Alticinae sp.14    | Alticinae sp.14    | Network131 | 3Cluster167 | 5Cluster164 | 75Cluster154 | GMYC162 | PTP188 | H204 |
| BT_0791_Eumolpinae sp. 16  | Eumolpinae sp. 16  | Network286 | 3Cluster184 | 5Cluster180 | 75Cluster168 | GMYC002 | PTP012 | H421 |
| BT_0792_Alticinae sp. 115  | Alticinae sp. 115  | Network10  | 3Cluster030 | 5Cluster031 | 75Cluster031 | GMYC253 | PTP060 | H010 |
| BT_0794_Alticinae sp. 129  | Alticinae sp. 129  | Network212 | 3Cluster034 | 5Cluster035 | 75Cluster035 | GMYC065 | PTP098 | H325 |
| BT_0795_Alticinae sp. 96   | Alticinae sp. 96   | Network85  | 3Cluster044 | 5Cluster045 | 75Cluster045 | GMYC051 | PTP169 | H128 |
| BT_0796_Alticinae sp. 97   | Alticinae sp. 97   | Network13  | 3Cluster035 | 5Cluster036 | 75Cluster036 | GMYC258 | PTP065 | H018 |
| BT_0799_Cassidinae sp. 14  | Cassidinae sp. 14  | Network263 | 3Cluster186 | 5Cluster065 | 75Cluster065 | GMYC282 | PTP040 | H394 |
| BT_0800_Galerucinae sp. 30 | Galerucinae sp. 30 | Network184 | 3Cluster070 | 5Cluster071 | 75Cluster070 | GMYC110 | PTP240 | H282 |
| BT_0803_Galerucinae sp. 76 | Galerucinae sp. 76 | Network118 | 3Cluster008 | 5Cluster008 | 75Cluster008 | GMYC113 | PTP288 | H185 |
| BT_0804_Alticinae sp. 28   | Alticinae sp. 28   | Network29  | 3Cluster039 | 5Cluster040 | 75Cluster040 | GMYC209 | PTP129 | H042 |
| BT_0805_Alticinae sp. 14   | Alticinae sp. 14   | Network131 | 3Cluster167 | 5Cluster164 | 75Cluster154 | GMYC162 | PTP188 | H204 |
| BT_0806_Alticinae sp. 13   | Alticinae sp. 13   | Network175 | 3Cluster147 | 5Cluster156 | 75Cluster141 | GMYC066 | PTP090 | H271 |
| BT_0807_Alticinae sp. 54   | Alticinae sp. 54   | Network44  | 3Cluster161 | 5Cluster158 | 75Cluster149 | GMYC215 | PTP123 | H063 |
| BT_0809_Alticinae sp. 12   | Alticinae sp. 12   | Network150 | 3Cluster187 | 5Cluster182 | 75Cluster170 | GMYC239 | PTP084 | H231 |
| BT_0810_Galerucinae sp. 46 | Galerucinae sp. 46 | Network156 | 3Cluster050 | 5Cluster051 | 75Cluster051 | GMYC179 | PTP250 | H242 |
| BT_0811_Criocerinae sp. 6  | Criocerinae sp. 6  | Network238 | 3Cluster188 | 5Cluster183 | 75Cluster171 | GMYC266 | PTP058 | H360 |
| BT_0813_Criocerinae sp. 4  | Criocerinae sp. 4  | Network239 | 3Cluster189 | 5Cluster184 | 75Cluster172 | GMYC262 | PTP055 | H361 |
| BT_0814_Alticinae sp. 86   | Alticinae sp. 86   | Network48  | 3Cluster074 | 5Cluster075 | 75Cluster074 | GMYC216 | PTP105 | H078 |
| BT_0815_Alticinae sp. 32   | Alticinae sp. 32   | Network150 | 3Cluster187 | 5Cluster182 | 75Cluster170 | GMYC239 | PTP084 | H232 |
| BT_0816_Galerucinae sp. 19 | Galerucinae sp. 19 | Network120 | 3Cluster179 | 5Cluster175 | 75Cluster164 | GMYC112 | PTP285 | H188 |
| BT_0817_Alticinae sp. 87   | Alticinae sp. 87   | Network88  | 3Cluster028 | 5Cluster029 | 75Cluster029 | GMYC061 | PTP164 | H139 |
| BT_0818_Galerucinae sp. 61 | Galerucinae sp. 61 | Network93  | 3Cluster041 | 5Cluster042 | 75Cluster042 | GMYC131 | PTP279 | H149 |
| BT_0819_Eumolpinae sp. 074 | Eumolpinae sp. 074 | Network244 | 3Cluster062 | 5Cluster063 | 75Cluster063 | GMYC031 | PTP002 | H369 |
| BT_0820_Eumolpinae sp. 38  | Eumolpinae sp. 38  | Network284 | 3Cluster025 | 5Cluster026 | 75Cluster026 | GMYC010 | PTP017 | H418 |
| BT_0823_Galerucinae sp. 34 | Galerucinae sp. 34 | Network183 | 3Cluster037 | 5Cluster038 | 75Cluster038 | GMYC103 | PTP232 | H281 |
| BT_0827_Eumolpinae sp. 20  | Eumolpinae sp. 20  | Network289 | 3Cluster077 | 5Cluster078 | 75Cluster077 | GMYC003 | PTP010 | H425 |
| BT_0828_Alticinae sp. 118  | Alticinae sp. 118  | Network169 | 3Cluster155 | 5Cluster152 | 75Cluster054 | GMYC188 | PTP109 | H260 |
| BT_0829_Alticinae sp. 115  | Alticinae sp. 115  | Network10  | 3Cluster030 | 5Cluster031 | 75Cluster031 | GMYC253 | PTP060 | H010 |
| BT_0831_Alticinae sp. 147  | Alticinae sp. 147  | Network65  | 3Cluster190 | 5Cluster185 | 75Cluster173 | GMYC194 | PTP211 | H104 |
| BT_0835_Galerucinae sp. 29 | Galerucinae sp. 29 | Network94  | 3Cluster191 | 5Cluster186 | 75Cluster174 | GMYC125 | PTP275 | H150 |
| BT_0836_Alticinae sp. 3    | Alticinae sp. 3    | Network185 | 3Cluster192 | 5Cluster187 | 75Cluster175 | GMYC095 | PTP197 | H283 |
| BT_0837_Alticinae sp. 9    | Alticinae sp. 9    | Network192 | 3Cluster096 | 5Cluster096 | 75Cluster095 | GMYC099 | PTP196 | H298 |
| BT_0839_Alticinae sp. 40   | Alticinae sp. 40   | Network56  | 3Cluster193 | 5Cluster188 | 75Cluster176 | GMYC223 | PTP118 | H091 |
| BT_0840_Alticinae sp. 140  | Alticinae sp. 140  | Network123 | 3Cluster122 | 5Cluster120 | 75Cluster119 | GMYC158 | PTP186 | H194 |
| BT_0841_Alticinae sp. 127  | Alticinae sp. 127  | Network4   | 3Cluster194 | 5Cluster189 | 75Cluster177 | GMYC247 | PTP092 | H004 |
| BT_0843_Alticinae sp. 136  | Alticinae sp. 136  | Network165 | 3Cluster172 | 5Cluster169 | 75Cluster159 | GMYC159 | PTP185 | H256 |
| BT_0847_Eumolpinae sp. 5   | Eumolpinae sp. 5   | Network285 | 3Cluster013 | 5Cluster014 | 75Cluster014 | GMYC009 | PTP016 | H419 |
| BT_0848_Alticinae sp. 45   | Alticinae sp. 45   | Network55  | 3Cluster195 | 5Cluster190 | 75Cluster178 | GMYC225 | PTP119 | H090 |
| BT_0850_Alticinae sp. 49   | Alticinae sp. 49   | Network141 | 3Cluster196 | 5Cluster191 | 75Cluster179 | GMYC032 | PTP085 | H218 |
| BT_0851_Alticinae sp. 65   | Alticinae sp. 65   | Network85  | 3Cluster044 | 5Cluster045 | 75Cluster045 | GMYC051 | PTP169 | H131 |
| BT_0852_Alticinae sp. 133  | Alticinae sp. 133  | Network130 | 3Cluster076 | 5Cluster077 | 75Cluster076 | GMYC170 | PTP192 | H203 |
| BT_0855_Alticinae sp. 018  | Alticinae sp. 018  | Network59  | 3Cluster158 | 5Cluster155 | 75Cluster147 | GMYC251 | PTP067 | H095 |
| BT_0861_Eumolpinae sp. 20  | Eumolpinae sp. 20  | Network289 | 3Cluster077 | 5Cluster078 | 75Cluster077 | GMYC003 | PTP010 | H425 |
| BT_0862_Alticinae sp. 115  | Alticinae sp. 115  | Network10  | 3Cluster030 | 5Cluster031 | 75Cluster031 | GMYC253 | PTP060 | H010 |
| BT_0864_Alticinae sp. 253  | Alticinae sp. 253  | Network13  | 3Cluster035 | 5Cluster036 | 75Cluster036 | GMYC258 | PTP065 | H018 |
| BT_0865_Alticinae sp. 96   | Alticinae sp. 96   | Network85  | 3Cluster044 | 5Cluster045 | 75Cluster045 | GMYC051 | PTP169 | H131 |
| BT_0871_Alticinae sp. 86   | Alticinae sp. 86   | Network48  | 3Cluster074 | 5Cluster075 | 75Cluster074 | GMYC216 | PTP105 | H074 |
| BT_0873_Alticinae sp. 85   | Alticinae sp. 85   | Network48  | 3Cluster074 | 5Cluster075 | 75Cluster074 | GMYC216 | PTP105 | H077 |
| BT_0949_Cassidinae sp. 2   | Cassidinae sp. 2   | Network259 | 3Cluster197 | 5Cluster192 | 75Cluster180 | GMYC283 | PTP037 | H390 |
| BT_0950_Cassidinae sp. 10  | Cassidinae sp. 10  | Network252 | 3Cluster198 | 5Cluster193 | 75Cluster181 | GMYC274 | PTP036 | H378 |
| BT_0951_Cassidinae sp. 11  | Cassidinae sp. 11  | Network260 | 3Cluster199 | 5Cluster194 | 75Cluster182 | GMYC279 | PTP045 | H391 |
| BT_0952_Alticinae sp. 269  | Alticinae sp. 269  | Network19  | 3Cluster200 | 5Cluster195 | 75Cluster183 | GMYC228 | PTP121 | H030 |
| BT_0953_Galerucinae sp. 28 | Galerucinae sp. 28 | Network63  | 3Cluster201 | 5Cluster196 | 75Cluster103 | GMYC129 | PTP282 | H099 |
| BT_0954_Galerucinae sp. 29 | Galerucinae sp. 29 | Network95  | 3Cluster202 | 5Cluster197 | 75Cluster184 | GMYC124 | PTP276 | H151 |
| BT_0955_Galerucinae sp. 20 | Galerucinae sp. 20 | Network119 | 3Cluster203 | 5Cluster198 | 75Cluster185 | GMYC122 | PTP277 | H186 |

|                             |                     |            |             |             |              |         |        |      |
|-----------------------------|---------------------|------------|-------------|-------------|--------------|---------|--------|------|
| BT_0957_Galerucinae sp. 36  | Galerucinae sp. 36  | Network208 | 3Cluster143 | 5Cluster141 | 75Cluster138 | GMYC146 | PTP254 | H321 |
| BT_0958_Alticinae sp. 154   | Alticinae sp. 154   | Network43  | 3Cluster204 | 5Cluster199 | 75Cluster186 | GMYC226 | PTP120 | H061 |
| BT_0959_Galerucinae sp. 52  | Galerucinae sp. 52  | Network201 | 3Cluster087 | 5Cluster087 | 75Cluster086 | GMYC107 | PTP231 | H310 |
| BT_0960_Galerucinae sp. 47  | Galerucinae sp. 47  | Network157 | 3Cluster205 | 5Cluster200 | 75Cluster187 | GMYC180 | PTP242 | H243 |
| BT_0961_Alticinae sp. 77    | Alticinae sp. 77    | Network86  | 3Cluster206 | 5Cluster201 | 75Cluster188 | GMYC047 | PTP165 | H132 |
| BT_0962_Alticinae sp. 76    | Alticinae sp. 76    | Network27  | 3Cluster207 | 5Cluster202 | 75Cluster189 | GMYC210 | PTP127 | H039 |
| BT_0964_Alticinae sp. 30    | Alticinae sp. 30    | Network23  | 3Cluster208 | 5Cluster203 | 75Cluster190 | GMYC232 | PTP074 | H035 |
| BT_0965_Criocerinae sp. 2   | Criocerinae sp. 2   | Network236 | 3Cluster209 | 5Cluster204 | 75Cluster191 | GMYC265 | PTP054 | H357 |
| BT_0966_Criocerinae sp. 3   | Criocerinae sp. 3   | Network3   | 3Cluster210 | 5Cluster205 | 75Cluster192 | GMYC030 | PTP031 | H003 |
| BT_0967_Eumolpinae sp. 46   | Eumolpinae sp. 46   | Network281 | 3Cluster211 | 5Cluster206 | 75Cluster193 | GMYC006 | PTP015 | H415 |
| BT_0968_Alticinae sp. 99    | Alticinae sp. 99    | Network66  | 3Cluster212 | 5Cluster207 | 75Cluster194 | GMYC046 | PTP170 | H105 |
| BT_0971_Alticinae sp. 194   | Alticinae sp. 194   | Network25  | 3Cluster213 | 5Cluster208 | 75Cluster195 | GMYC202 | PTP130 | H037 |
| BT_0972_Alticinae sp. 127   | Alticinae sp. 127   | Network4   | 3Cluster194 | 5Cluster189 | 75Cluster177 | GMYC247 | PTP092 | H004 |
| BT_0973_Alticinae sp. 97    | Alticinae sp. 97    | Network9   | 3Cluster214 | 5Cluster209 | 75Cluster196 | GMYC252 | PTP059 | H009 |
| BT_1030_Alticinae sp. 240   | Alticinae sp. 240   | Network20  | 3Cluster215 | 5Cluster210 | 75Cluster197 | GMYC229 | PTP073 | H031 |
| BT_1031_Alticinae sp. 2     | Alticinae sp. 2     | Network187 | 3Cluster010 | 5Cluster010 | 75Cluster010 | GMYC087 | PTP204 | H285 |
| BT_1033_Alticinae sp. 149   | Alticinae sp. 149   | Network191 | 3Cluster115 | 5Cluster011 | 75Cluster011 | GMYC088 | PTP203 | H294 |
| BT_1034_Alticinae sp. 48    | Alticinae sp. 48    | Network44  | 3Cluster161 | 5Cluster158 | 75Cluster149 | GMYC215 | PTP123 | H062 |
| BT_1035_Alticinae sp. 150   | Alticinae sp. 150   | Network191 | 3Cluster115 | 5Cluster011 | 75Cluster011 | GMYC088 | PTP203 | H295 |
| BT_1036_Alticinae sp. 62    | Alticinae sp. 62    | Network57  | 3Cluster043 | 5Cluster044 | 75Cluster044 | GMYC224 | PTP117 | H093 |
| BT_1038_Alticinae sp. 65    | Alticinae sp. 65    | Network85  | 3Cluster044 | 5Cluster045 | 75Cluster045 | GMYC051 | PTP169 | H131 |
| BT_1043_Alticinae sp. 66    | Alticinae sp. 66    | Network85  | 3Cluster044 | 5Cluster045 | 75Cluster045 | GMYC051 | PTP169 | H131 |
| BT_1055_Alticinae sp. 85    | Alticinae sp. 85    | Network48  | 3Cluster074 | 5Cluster075 | 75Cluster074 | GMYC216 | PTP105 | H075 |
| BT_1060_Alticinae sp. 85    | Alticinae sp. 85    | Network48  | 3Cluster074 | 5Cluster075 | 75Cluster074 | GMYC216 | PTP105 | H079 |
| BT_1061_Galerucinae sp. 096 | Galerucinae sp. 096 | Network180 | 3Cluster049 | 5Cluster050 | 75Cluster050 | GMYC174 | PTP252 | H277 |
| BT_1064_Alticinae sp. 142   | Alticinae sp. 142   | Network132 | 3Cluster081 | 5Cluster081 | 75Cluster080 | GMYC167 | PTP189 | H206 |
| BT_1065_Alticinae sp. 20    | Alticinae sp. 20    | Network178 | 3Cluster216 | 5Cluster211 | 75Cluster198 | GMYC152 | PTP070 | H275 |
| BT_1070_Alticinae sp. 97    | Alticinae sp. 97    | Network13  | 3Cluster035 | 5Cluster036 | 75Cluster036 | GMYC258 | PTP065 | H018 |
| BT_1071_Alticinae sp. 96    | Alticinae sp. 96    | Network85  | 3Cluster044 | 5Cluster045 | 75Cluster045 | GMYC051 | PTP169 | H131 |
| BT_1079_Alticinae sp. 104   | Alticinae sp. 104   | Network17  | 3Cluster101 | 5Cluster101 | 75Cluster100 | GMYC235 | PTP080 | H027 |
| BT_1080_Eumolpinae sp. 074  | Eumolpinae sp. 074  | Network244 | 3Cluster062 | 5Cluster063 | 75Cluster063 | GMYC031 | PTP002 | H368 |
| BT_1081_Alticinae sp. 27    | Alticinae sp. 27    | Network51  | 3Cluster217 | 5Cluster212 | 75Cluster199 | GMYC222 | PTP113 | H083 |
| BT_1082_Alticinae sp. 104   | Alticinae sp. 104   | Network17  | 3Cluster101 | 5Cluster101 | 75Cluster100 | GMYC235 | PTP080 | H026 |
| BT_1083_Alticinae sp. 96    | Alticinae sp. 96    | Network85  | 3Cluster044 | 5Cluster045 | 75Cluster045 | GMYC051 | PTP169 | H131 |
| BT_1085_Alticinae sp. 61    | Alticinae sp. 61    | Network8   | 3Cluster068 | 5Cluster069 | 75Cluster069 | GMYC259 | PTP066 | H008 |
| BT_1086_Alticinae sp. 83    | Alticinae sp. 83    | Network22  | 3Cluster083 | 5Cluster083 | 75Cluster082 | GMYC230 | PTP072 | H034 |
| BT_1087_Alticinae sp. 109   | Alticinae sp. 109   | Network171 | 3Cluster046 | 5Cluster047 | 75Cluster047 | GMYC254 | PTP062 | H265 |
| BT_1088_Galerucinae sp. 31  | Galerucinae sp. 31  | Network203 | 3Cluster061 | 5Cluster062 | 75Cluster062 | GMYC084 | PTP217 | H315 |
| BT_1090_Alticinae sp. 19    | Alticinae sp. 19    | Network58  | 3Cluster218 | 5Cluster213 | 75Cluster200 | GMYC245 | PTP097 | H094 |
| BT_1091_Cassidinae sp. 12   | Cassidinae sp. 12   | Network243 | 3Cluster149 | 5Cluster146 | 75Cluster142 | GMYC278 | PTP044 | H366 |
| BT_1092_Cassidinae sp. 3    | Cassidinae sp. 3    | Network254 | 3Cluster219 | 5Cluster214 | 75Cluster201 | GMYC285 | PTP052 | H381 |
| BT_1093_Hispinae sp. 7      | Hispinae sp. 7      | Network258 | 3Cluster220 | 5Cluster215 | 75Cluster202 | GMYC267 | PTP035 | H389 |
| BT_1094_Eumolpinae sp. 38   | Eumolpinae sp. 38   | Network284 | 3Cluster025 | 5Cluster026 | 75Cluster026 | GMYC010 | PTP017 | H418 |
| BT_1095_Alticinae sp. 96    | Alticinae sp. 96    | Network85  | 3Cluster044 | 5Cluster045 | 75Cluster045 | GMYC051 | PTP169 | H128 |
| BT_1096_Galerucinae sp. 36  | Galerucinae sp. 36  | Network208 | 3Cluster143 | 5Cluster141 | 75Cluster138 | GMYC146 | PTP254 | H320 |
| BT_1098_Alticinae sp. 97    | Alticinae sp. 97    | Network13  | 3Cluster035 | 5Cluster036 | 75Cluster036 | GMYC258 | PTP065 | H017 |
| BT_1104_Alticinae sp. 140   | Alticinae sp. 140   | Network122 | 3Cluster153 | 5Cluster150 | 75Cluster144 | GMYC157 | PTP187 | H190 |
| BT_1105_Alticinae sp. 74    | Alticinae sp. 74    | Network177 | 3Cluster221 | 5Cluster216 | 75Cluster203 | GMYC244 | PTP096 | H274 |
| BT_1106_Galerucinae sp. 64  | Galerucinae sp. 64  | Network222 | 3Cluster148 | 5Cluster145 | 75Cluster060 | GMYC080 | PTP221 | H340 |
| BT_1107_Alticinae sp. 099   | Alticinae sp. 099   | Network173 | 3Cluster222 | 5Cluster217 | 75Cluster204 | GMYC242 | PTP207 | H267 |
| BT_1108_Alticinae sp. 92    | Alticinae sp. 92    | Network200 | 3Cluster135 | 5Cluster133 | 75Cluster132 | GMYC191 | PTP208 | H309 |
| BT_1109_Alticinae sp. 41    | Alticinae sp. 41    | Network136 | 3Cluster223 | 5Cluster218 | 75Cluster205 | GMYC161 | PTP177 | H210 |
| BT_1110_Galerucinae sp. 46  | Galerucinae sp. 46  | Network156 | 3Cluster050 | 5Cluster051 | 75Cluster051 | GMYC179 | PTP250 | H242 |
| BT_1112_Alticinae sp. 112   | Alticinae sp. 112   | Network145 | 3Cluster224 | 5Cluster219 | 75Cluster206 | GMYC190 | PTP209 | H223 |
| BT_1114_Alticinae sp. 41    | Alticinae sp. 41    | Network136 | 3Cluster223 | 5Cluster218 | 75Cluster205 | GMYC161 | PTP177 | H210 |
| BT_1117_Alticinae sp. 49    | Alticinae sp. 49    | Network141 | 3Cluster196 | 5Cluster191 | 75Cluster179 | GMYC032 | PTP085 | H219 |
| BT_1118_Alticinae sp. 123   | Alticinae sp. 123   | Network148 | 3Cluster036 | 5Cluster037 | 75Cluster037 | GMYC070 | PTP144 | H229 |
| BT_1119_Alticinae sp. 96    | Alticinae sp. 96    | Network85  | 3Cluster044 | 5Cluster045 | 75Cluster045 | GMYC051 | PTP169 | H131 |
| BT_1121_Alticinae sp. 124   | Alticinae sp. 124   | Network87  | 3Cluster032 | 5Cluster033 | 75Cluster033 | GMYC048 | PTP166 | H133 |
| BT_1122_Alticinae sp. 265   | Alticinae sp. 265   | Network60  | 3Cluster150 | 5Cluster147 | 75Cluster143 | GMYC068 | PTP142 | H096 |
| BT_1124_Cassidinae sp. 7    | Cassidinae sp. 7    | Network245 | 3Cluster065 | 5Cluster066 | 75Cluster066 | GMYC276 | PTP042 | H370 |
| BT_1125_Galerucinae sp. 59  | Galerucinae sp. 59  | Network197 | 3Cluster060 | 5Cluster061 | 75Cluster061 | GMYC108 | PTP230 | H306 |
| BT_1126_Hispinae sp. 3      | Hispinae sp. 3      | Network247 | 3Cluster066 | 5Cluster067 | 75Cluster067 | GMYC272 | PTP050 | H372 |
| BT_1127_Alticinae sp. 66    | Alticinae sp. 66    | Network85  | 3Cluster044 | 5Cluster045 | 75Cluster045 | GMYC051 | PTP169 | H131 |
| BT_1128_Alticinae sp. 18    | Alticinae sp. 18    | Network6   | 3Cluster225 | 5Cluster220 | 75Cluster207 | GMYC260 | PTP069 | H006 |
| BT_1129_Alticinae sp. 123   | Alticinae sp. 123   | Network148 | 3Cluster036 | 5Cluster037 | 75Cluster037 | GMYC070 | PTP144 | H227 |
| BT_1131_Alticinae sp. 081   | Alticinae sp. 081   | Network210 | 3Cluster084 | 5Cluster084 | 75Cluster083 | GMYC069 | PTP143 | H323 |
| BT_1132_Alticinae sp. 86    | Alticinae sp. 86    | Network48  | 3Cluster074 | 5Cluster075 | 75Cluster074 | GMYC216 | PTP105 | H079 |
| BT_1138_Alticinae sp. 86    | Alticinae sp. 86    | Network48  | 3Cluster074 | 5Cluster075 | 75Cluster074 | GMYC216 | PTP105 | H075 |

|                             |                     |            |             |             |              |         |        |      |
|-----------------------------|---------------------|------------|-------------|-------------|--------------|---------|--------|------|
| BT_1142_Alticinae sp. 96    | Alticinae sp. 96    | Network85  | 3Cluster044 | 5Cluster045 | 75Cluster045 | GMYC051 | PTP169 | H131 |
| BT_1143_Hispinae sp. 7      | Hispinae sp. 7      | Network258 | 3Cluster220 | 5Cluster215 | 75Cluster202 | GMYC267 | PTP035 | H389 |
| BT_1145_Cassidinae sp. 3    | Cassidinae sp. 3    | Network254 | 3Cluster219 | 5Cluster214 | 75Cluster201 | GMYC285 | PTP052 | H381 |
| BT_1146_Eumolpinae sp. 14   | Eumolpinae sp. 14   | Network285 | 3Cluster013 | 5Cluster014 | 75Cluster014 | GMYC009 | PTP016 | H420 |
| BT_1147_Alticinae sp. 152   | Alticinae sp. 152   | Network34  | 3Cluster226 | 5Cluster221 | 75Cluster208 | GMYC205 | PTP134 | H048 |
| BT_1148_Alticinae sp. 96    | Alticinae sp. 96    | Network85  | 3Cluster044 | 5Cluster045 | 75Cluster045 | GMYC051 | PTP169 | H131 |
| BT_1151_Alticinae sp. 57    | Alticinae sp. 57    | Network70  | 3Cluster227 | 5Cluster222 | 75Cluster209 | GMYC059 | PTP159 | H110 |
| BT_1152_Alticinae sp. 141   | Alticinae sp. 141   | Network215 | 3Cluster228 | 5Cluster108 | 75Cluster107 | GMYC172 | PTP183 | H328 |
| BT_1157_Alticinae sp. 149   | Alticinae sp. 149   | Network188 | 3Cluster119 | 5Cluster117 | 75Cluster116 | GMYC091 | PTP200 | H286 |
| BT_1158_Alticinae sp. 146   | Alticinae sp. 146   | Network121 | 3Cluster229 | 5Cluster223 | 75Cluster210 | GMYC160 | PTP184 | H189 |
| BT_1160_Alticinae sp. 55    | Alticinae sp. 55    | Network138 | 3Cluster230 | 5Cluster224 | 75Cluster211 | GMYC250 | PTP095 | H213 |
| BT_1161_Alticinae sp. 143   | Alticinae sp. 143   | Network123 | 3Cluster122 | 5Cluster120 | 75Cluster119 | GMYC158 | PTP186 | H196 |
| BT_1165_Alticinae sp. 61    | Alticinae sp. 61    | Network8   | 3Cluster068 | 5Cluster069 | 75Cluster069 | GMYC259 | PTP066 | H008 |
| BT_1166_Alticinae sp. 140   | Alticinae sp. 140   | Network122 | 3Cluster153 | 5Cluster150 | 75Cluster144 | GMYC157 | PTP187 | H191 |
| BT_1170_Alticinae sp. 105   | Alticinae sp. 105   | Network16  | 3Cluster116 | 5Cluster114 | 75Cluster113 | GMYC234 | PTP079 | H025 |
| BT_1171_Alticinae sp. 85    | Alticinae sp. 85    | Network47  | 3Cluster138 | 5Cluster136 | 75Cluster135 | GMYC217 | PTP104 | H070 |
| BT_1175_Alticinae sp. 87    | Alticinae sp. 87    | Network88  | 3Cluster028 | 5Cluster029 | 75Cluster029 | GMYC061 | PTP164 | H140 |
| BT_1176_Alticinae sp. 52    | Alticinae sp. 52    | Network33  | 3Cluster231 | 5Cluster225 | 75Cluster212 | GMYC199 | PTP137 | H047 |
| BT_1178_Alticinae sp. 87    | Alticinae sp. 87    | Network88  | 3Cluster028 | 5Cluster029 | 75Cluster029 | GMYC061 | PTP164 | H140 |
| BT_1179_Alticinae sp. 118   | Alticinae sp. 118   | Network169 | 3Cluster155 | 5Cluster152 | 75Cluster054 | GMYC188 | PTP109 | H260 |
| BT_1194_Alticinae sp. 87    | Alticinae sp. 87    | Network88  | 3Cluster028 | 5Cluster029 | 75Cluster029 | GMYC061 | PTP164 | H136 |
| BT_1196_Alticinae sp. 108   | Alticinae sp. 108   | Network78  | 3Cluster232 | 5Cluster226 | 75Cluster213 | GMYC036 | PTP145 | H120 |
| BT_1197_Alticinae sp. 104   | Alticinae sp. 104   | Network17  | 3Cluster101 | 5Cluster101 | 75Cluster100 | GMYC235 | PTP080 | H026 |
| BT_1198_Alticinae sp. 131   | Alticinae sp. 131   | Network164 | 3Cluster104 | 5Cluster103 | 75Cluster102 | GMYC237 | PTP077 | H254 |
| BT_1199_Alticinae sp. 118   | Alticinae sp. 118   | Network167 | 3Cluster233 | 5Cluster227 | 75Cluster214 | GMYC186 | PTP110 | H258 |
| BT_1205_Alticinae sp. 52    | Alticinae sp. 52    | Network36  | 3Cluster234 | 5Cluster228 | 75Cluster215 | GMYC204 | PTP132 | H050 |
| BT_1208_Galerucinae sp. 46  | Galerucinae sp. 46  | Network155 | 3Cluster026 | 5Cluster027 | 75Cluster027 | GMYC178 | PTP249 | H241 |
| BT_1210_Alticinae sp. 64    | Alticinae sp. 64    | Network75  | 3Cluster157 | 5Cluster154 | 75Cluster101 | GMYC042 | PTP148 | H117 |
| BT_1211_Alticinae sp. 18    | Alticinae sp. 18    | Network59  | 3Cluster158 | 5Cluster155 | 75Cluster147 | GMYC251 | PTP067 | H095 |
| BT_1212_Alticinae sp. 17    | Alticinae sp. 17    | Network44  | 3Cluster161 | 5Cluster158 | 75Cluster149 | GMYC215 | PTP123 | H065 |
| BT_1213_Alticinae sp. 96    | Alticinae sp. 96    | Network85  | 3Cluster044 | 5Cluster045 | 75Cluster045 | GMYC051 | PTP169 | H131 |
| BT_1214_Alticinae sp. 104   | Alticinae sp. 104   | Network161 | 3Cluster235 | 5Cluster229 | 75Cluster216 | GMYC236 | PTP078 | H249 |
| BT_1215_Alticinae sp. 144   | Alticinae sp. 144   | Network129 | 3Cluster236 | 5Cluster230 | 75Cluster217 | GMYC163 | PTP178 | H202 |
| BT_1216_Alticinae sp. 49    | Alticinae sp. 49    | Network141 | 3Cluster196 | 5Cluster191 | 75Cluster179 | GMYC032 | PTP085 | H217 |
| BT_1217_Alticinae sp. 145   | Alticinae sp. 145   | Network124 | 3Cluster237 | 5Cluster231 | 75Cluster218 | GMYC168 | PTP191 | H197 |
| BT_1219_Alticinae sp. 86    | Alticinae sp. 86    | Network48  | 3Cluster074 | 5Cluster075 | 75Cluster074 | GMYC216 | PTP105 | H078 |
| BT_1220_Galerucinae sp. 34  | Galerucinae sp. 34  | Network183 | 3Cluster037 | 5Cluster038 | 75Cluster038 | GMYC103 | PTP232 | H280 |
| BT_1222_Alticinae sp. 52    | Alticinae sp. 52    | Network36  | 3Cluster234 | 5Cluster228 | 75Cluster215 | GMYC204 | PTP132 | H051 |
| BT_1223_Alticinae sp. 28    | Alticinae sp. 28    | Network29  | 3Cluster039 | 5Cluster040 | 75Cluster040 | GMYC209 | PTP129 | H042 |
| BT_1224_Galerucinae sp. 75  | Galerucinae sp. 75  | Network227 | 3Cluster145 | 5Cluster143 | 75Cluster110 | GMYC082 | PTP219 | H347 |
| BT_1225_Eumolpinae sp. 40   | Eumolpinae sp. 40   | Network257 | 3Cluster003 | 5Cluster003 | 75Cluster003 | GMYC003 | PTP003 | H388 |
| BT_1226_Galerucinae sp. 34  | Galerucinae sp. 34  | Network183 | 3Cluster037 | 5Cluster038 | 75Cluster038 | GMYC103 | PTP232 | H280 |
| BT_1228_Alticinae sp. 96    | Alticinae sp. 96    | Network85  | 3Cluster044 | 5Cluster045 | 75Cluster045 | GMYC051 | PTP169 | H131 |
| BT_1230_Alticinae sp. 115   | Alticinae sp. 115   | Network10  | 3Cluster030 | 5Cluster031 | 75Cluster031 | GMYC253 | PTP060 | H011 |
| BT_1233_Alticinae sp. 52    | Alticinae sp. 52    | Network35  | 3Cluster238 | 5Cluster228 | 75Cluster215 | GMYC203 | PTP133 | H049 |
| BT_1235_Alticinae sp. 96    | Alticinae sp. 96    | Network85  | 3Cluster044 | 5Cluster045 | 75Cluster045 | GMYC051 | PTP169 | H129 |
| BT_1240_Eumolpinae sp. 41   | Eumolpinae sp. 41   | Network256 | 3Cluster239 | 5Cluster232 | 75Cluster219 | GMYC029 | PTP001 | H383 |
| BT_1245_Alticinae sp. 85    | Alticinae sp. 85    | Network47  | 3Cluster138 | 5Cluster136 | 75Cluster135 | GMYC217 | PTP104 | H072 |
| BT_1249_Alticinae sp. 104   | Alticinae sp. 104   | Network17  | 3Cluster101 | 5Cluster101 | 75Cluster100 | GMYC235 | PTP080 | H028 |
| BT_1251_Alticinae sp. 131   | Alticinae sp. 131   | Network164 | 3Cluster104 | 5Cluster103 | 75Cluster102 | GMYC237 | PTP077 | H254 |
| BT_1252_Alticinae sp. 86    | Alticinae sp. 86    | Network48  | 3Cluster074 | 5Cluster075 | 75Cluster074 | GMYC216 | PTP105 | H079 |
| BT_1258_Galerucinae sp. 28  | Galerucinae sp. 28  | Network64  | 3Cluster105 | 5Cluster104 | 75Cluster103 | GMYC128 | PTP283 | H103 |
| BT_1259_Galerucinae sp. 049 | Galerucinae sp. 049 | Network158 | 3Cluster108 | 5Cluster107 | 75Cluster106 | GMYC182 | PTP244 | H245 |
| BT_1260_Eumolpinae sp. 24   | Eumolpinae sp. 24   | Network279 | 3Cluster098 | 5Cluster098 | 75Cluster097 | GMYC014 | PTP021 | H412 |
| BT_1263_Alticinae sp. 51    | Alticinae sp. 51    | Network41  | 3Cluster089 | 5Cluster089 | 75Cluster088 | GMYC197 | PTP126 | H058 |
| BT_1264_Alticinae sp. 78    | Alticinae sp. 78    | Network147 | 3Cluster240 | 5Cluster233 | 75Cluster220 | GMYC255 | PTP061 | H226 |
| BT_1267_Alticinae sp. 128   | Alticinae sp. 128   | Network91  | 3Cluster093 | 5Cluster093 | 75Cluster092 | GMYC055 | PTP160 | H145 |
| BT_1269_Alticinae sp. 9     | Alticinae sp. 9     | Network192 | 3Cluster096 | 5Cluster096 | 75Cluster095 | GMYC099 | PTP196 | H299 |
| BT_1270_Galerucinae sp. 28  | Galerucinae sp. 28  | Network63  | 3Cluster201 | 5Cluster196 | 75Cluster103 | GMYC129 | PTP282 | H100 |
| BT_1271_Alticinae sp. 57    | Alticinae sp. 57    | Network69  | 3Cluster241 | 5Cluster234 | 75Cluster221 | GMYC060 | PTP158 | H109 |
| BT_1272_Alticinae sp. 128   | Alticinae sp. 128   | Network89  | 3Cluster113 | 5Cluster112 | 75Cluster111 | GMYC054 | PTP163 | H142 |
| BT_1273_Galerucinae sp. 28  | Galerucinae sp. 28  | Network64  | 3Cluster105 | 5Cluster104 | 75Cluster103 | GMYC128 | PTP283 | H101 |
| BT_1274_Alticinae sp. 42    | Alticinae sp. 42    | Network52  | 3Cluster002 | 5Cluster002 | 75Cluster002 | GMYC219 | PTP114 | H084 |
| BT_1275_Alticinae sp. 51    | Alticinae sp. 51    | Network39  | 3Cluster242 | 5Cluster235 | 75Cluster222 | GMYC196 | PTP124 | H055 |
| BT_1278_Alticinae sp. 143   | Alticinae sp. 143   | Network123 | 3Cluster122 | 5Cluster120 | 75Cluster119 | GMYC158 | PTP186 | H194 |
| BT_1280_Alticinae sp. 69    | Alticinae sp. 69    | Network83  | 3Cluster243 | 5Cluster236 | 75Cluster223 | GMYC045 | PTP154 | H126 |
| BT_1281_Galerucinae sp. 47  | Galerucinae sp. 47  | Network157 | 3Cluster205 | 5Cluster200 | 75Cluster187 | GMYC180 | PTP242 | H243 |
| BT_1282_Galerucinae sp. 52  | Galerucinae sp. 52  | Network201 | 3Cluster087 | 5Cluster087 | 75Cluster086 | GMYC107 | PTP231 | H310 |
| BT_1283_Galerucinae sp. 6   | Galerucinae sp. 6   | Network104 | 3Cluster244 | 5Cluster237 | 75Cluster224 | GMYC133 | PTP256 | H163 |

|                            |                    |            |             |             |              |         |        |      |
|----------------------------|--------------------|------------|-------------|-------------|--------------|---------|--------|------|
| BT_1284_Galerucinae sp. 63 | Galerucinae sp. 63 | Network100 | 3Cluster245 | 5Cluster238 | 75Cluster225 | GMYC121 | PTP269 | H157 |
| BT_1286_Alticinae sp. 21   | Alticinae sp. 21   | Network67  | 3Cluster246 | 5Cluster239 | 75Cluster226 | GMYC050 | PTP167 | H106 |
| BT_1287_Alticinae sp. 67   | Alticinae sp. 67   | Network80  | 3Cluster247 | 5Cluster240 | 75Cluster227 | GMYC058 | PTP155 | H123 |
| BT_1288_Alticinae sp. 103  | Alticinae sp. 103  | Network40  | 3Cluster248 | 5Cluster241 | 75Cluster228 | GMYC198 | PTP125 | H056 |
| BT_1293_Alticinae sp. 50   | Alticinae sp. 50   | Network45  | 3Cluster094 | 5Cluster094 | 75Cluster093 | GMYC211 | PTP107 | H067 |
| BT_1294_Galerucinae sp. 72 | Galerucinae sp. 72 | Network230 | 3Cluster118 | 5Cluster116 | 75Cluster115 | GMYC074 | PTP226 | H350 |
| BT_1295_Alticinae sp. 57   | Alticinae sp. 57   | Network70  | 3Cluster227 | 5Cluster222 | 75Cluster209 | GMYC059 | PTP159 | H111 |
| BT_1304_Galerucinae sp. 47 | Galerucinae sp. 47 | Network157 | 3Cluster205 | 5Cluster200 | 75Cluster187 | GMYC180 | PTP242 | H243 |
| BT_1305_Alticinae sp. 93   | Alticinae sp. 93   | Network37  | 3Cluster249 | 5Cluster242 | 75Cluster229 | GMYC249 | PTP091 | H052 |
| BT_1307_Eumolpinae sp. 16  | Eumolpinae sp. 16  | Network286 | 3Cluster184 | 5Cluster180 | 75Cluster168 | GMYC002 | PTP012 | H422 |
| BT_1308_Alticinae sp. 134  | Alticinae sp. 134  | Network134 | 3Cluster250 | 5Cluster243 | 75Cluster230 | GMYC166 | PTP176 | H208 |
| BT_1310_Alticinae sp. 35   | Alticinae sp. 35   | Network144 | 3Cluster251 | 5Cluster110 | 75Cluster109 | GMYC034 | PTP087 | H222 |
| BT_1311_Alticinae sp. 69   | Alticinae sp. 69   | Network82  | 3Cluster252 | 5Cluster244 | 75Cluster231 | GMYC056 | PTP157 | H125 |
| BT_1312_Alticinae sp. 93   | Alticinae sp. 93   | Network37  | 3Cluster249 | 5Cluster242 | 75Cluster229 | GMYC249 | PTP091 | H052 |
| BT_1318_Eumolpinae sp. 24  | Eumolpinae sp. 24  | Network279 | 3Cluster098 | 5Cluster098 | 75Cluster097 | GMYC014 | PTP021 | H412 |
| BT_1319_Alticinae sp. 51   | Alticinae sp. 51   | Network41  | 3Cluster089 | 5Cluster089 | 75Cluster088 | GMYC197 | PTP126 | H058 |
| BT_1321_Galerucinae sp. 61 | Galerucinae sp. 61 | Network93  | 3Cluster041 | 5Cluster042 | 75Cluster042 | GMYC131 | PTP279 | H149 |
| BT_1322_Alticinae sp. 19   | Alticinae sp. 19   | Network58  | 3Cluster218 | 5Cluster213 | 75Cluster200 | GMYC245 | PTP097 | H094 |
| BT_1323_Alticinae sp. 104  | Alticinae sp. 104  | Network161 | 3Cluster235 | 5Cluster229 | 75Cluster216 | GMYC236 | PTP078 | H251 |
| BT_1324_Alticinae sp. 92   | Alticinae sp. 92   | Network200 | 3Cluster135 | 5Cluster133 | 75Cluster132 | GMYC191 | PTP208 | H309 |
| BT_1326_Eumolpinae sp. 19  | Eumolpinae sp. 19  | Network265 | 3Cluster031 | 5Cluster032 | 75Cluster032 | GMYC028 | PTP004 | H396 |
| BT_1335_Alticinae sp. 118  | Alticinae sp. 118  | Network168 | 3Cluster253 | 5Cluster245 | 75Cluster232 | GMYC185 | PTP111 | H259 |
| BT_1340_Galerucinae sp. 66 | Galerucinae sp. 66 | Network225 | 3Cluster254 | 5Cluster246 | 75Cluster060 | GMYC078 | PTP223 | H344 |
| BT_1349_Alticinae sp. 51   | Alticinae sp. 51   | Network32  | 3Cluster164 | 5Cluster161 | 75Cluster152 | GMYC206 | PTP136 | H046 |
| BT_1350_Alticinae sp. 131  | Alticinae sp. 131  | Network164 | 3Cluster104 | 5Cluster103 | 75Cluster102 | GMYC237 | PTP077 | H254 |
| BT_2073_Alticinae sp. 22   | Alticinae sp. 22   | Network24  | 3Cluster255 | 5Cluster247 | 75Cluster233 | GMYC231 | PTP075 | H036 |
| BT_2074_Galerucinae sp. 34 | Galerucinae sp. 34 | Network183 | 3Cluster037 | 5Cluster038 | 75Cluster038 | GMYC103 | PTP232 | H280 |
| BT_2076_Alticinae sp. 2    | Alticinae sp. 2    | Network187 | 3Cluster010 | 5Cluster010 | 75Cluster010 | GMYC087 | PTP204 | H285 |
| BT_2077_Galerucinae sp. 7  | Galerucinae sp. 7  | Network109 | 3Cluster019 | 5Cluster020 | 75Cluster020 | GMYC134 | PTP267 | H169 |
| BT_2078_Alticinae sp. 265  | Alticinae sp. 265  | Network60  | 3Cluster150 | 5Cluster147 | 75Cluster143 | GMYC068 | PTP142 | H096 |
| BT_2081_Eumolpinae sp. 42  | Eumolpinae sp. 42  | Network257 | 3Cluster003 | 5Cluster003 | 75Cluster003 | GMYC001 | PTP003 | H386 |
| BT_2082_Alticinae sp. 64   | Alticinae sp. 64   | Network72  | 3Cluster256 | 5Cluster248 | 75Cluster234 | GMYC043 | PTP152 | H113 |
| BT_2084_Alticinae sp. 32   | Alticinae sp. 32   | Network150 | 3Cluster187 | 5Cluster182 | 75Cluster170 | GMYC239 | PTP084 | H233 |
| BT_2085_Eumolpinae sp. 42  | Eumolpinae sp. 42  | Network257 | 3Cluster003 | 5Cluster003 | 75Cluster003 | GMYC001 | PTP003 | H387 |
| BT_2087_Alticinae sp. 49   | Alticinae sp. 49   | Network141 | 3Cluster196 | 5Cluster191 | 75Cluster179 | GMYC032 | PTP085 | H218 |
| BT_2090_Alticinae sp. 81   | Alticinae sp. 81   | Network209 | 3Cluster084 | 5Cluster084 | 75Cluster083 | GMYC069 | PTP143 | H322 |
| BT_2093_Alticinae sp. 96   | Alticinae sp. 96   | Network85  | 3Cluster044 | 5Cluster045 | 75Cluster045 | GMYC051 | PTP169 | H130 |
| BT_2097_Alticinae sp. 122  | Alticinae sp. 122  | Network181 | 3Cluster257 | 5Cluster249 | 75Cluster235 | GMYC149 | PTP174 | H278 |
| BT_2101_Alticinae sp. 86   | Alticinae sp. 86   | Network48  | 3Cluster074 | 5Cluster075 | 75Cluster074 | GMYC216 | PTP105 | H080 |
| BT_2107_Alticinae sp. 85   | Alticinae sp. 85   | Network48  | 3Cluster074 | 5Cluster075 | 75Cluster074 | GMYC216 | PTP105 | H073 |
| BT_2109_Alticinae sp. 133  | Alticinae sp. 133  | Network130 | 3Cluster076 | 5Cluster077 | 75Cluster076 | GMYC170 | PTP192 | H203 |
| BT_2113_Alticinae sp. 142  | Alticinae sp. 142  | Network132 | 3Cluster081 | 5Cluster081 | 75Cluster080 | GMYC167 | PTP189 | H205 |
| BT_2119_Eumolpinae sp. 16  | Eumolpinae sp. 16  | Network286 | 3Cluster184 | 5Cluster180 | 75Cluster168 | GMYC002 | PTP012 | H421 |
| BT_2123_Alticinae sp. 18   | Alticinae sp. 18   | Network7   | 3Cluster258 | 5Cluster250 | 75Cluster236 | GMYC261 | PTP068 | H007 |
| BT_2135_Alticinae sp. 122  | Alticinae sp. 122  | Network181 | 3Cluster257 | 5Cluster249 | 75Cluster235 | GMYC149 | PTP174 | H278 |
| BT_2136_Alticinae sp. 110  | Alticinae sp. 110  | Network173 | 3Cluster222 | 5Cluster217 | 75Cluster204 | GMYC242 | PTP207 | H268 |
| BT_2138_Alticinae sp. 115  | Alticinae sp. 115  | Network10  | 3Cluster030 | 5Cluster031 | 75Cluster031 | GMYC253 | PTP060 | H010 |
| BT_2152_Eumolpinae sp. 38  | Eumolpinae sp. 38  | Network284 | 3Cluster025 | 5Cluster026 | 75Cluster026 | GMYC010 | PTP017 | H418 |
| BT_2154_Galerucinae sp. 17 | Galerucinae sp. 17 | Network115 | 3Cluster259 | 5Cluster251 | 75Cluster237 | GMYC123 | PTP278 | H180 |
| BT_2155_Alticinae sp. 115  | Alticinae sp. 115  | Network10  | 3Cluster030 | 5Cluster031 | 75Cluster031 | GMYC253 | PTP060 | H011 |
| BT_2156_Cassidinae sp. 12  | Cassidinae sp. 12  | Network243 | 3Cluster149 | 5Cluster146 | 75Cluster142 | GMYC278 | PTP044 | H367 |
| BT_2157_Eumolpinae sp. 24  | Eumolpinae sp. 24  | Network278 | 3Cluster260 | 5Cluster252 | 75Cluster097 | GMYC013 | PTP020 | H411 |
| BT_2158_Alticinae sp. 83   | Alticinae sp. 83   | Network22  | 3Cluster083 | 5Cluster083 | 75Cluster082 | GMYC230 | PTP072 | H034 |
| BT_2161_Cassidinae sp. 12  | Cassidinae sp. 12  | Network243 | 3Cluster149 | 5Cluster146 | 75Cluster142 | GMYC278 | PTP044 | H366 |
| BT_2168_Galerucinae sp. 36 | Galerucinae sp. 36 | Network208 | 3Cluster143 | 5Cluster141 | 75Cluster138 | GMYC146 | PTP254 | H320 |
| BT_2170_Galerucinae sp. 34 | Galerucinae sp. 34 | Network183 | 3Cluster037 | 5Cluster038 | 75Cluster038 | GMYC103 | PTP232 | H280 |
| BT_2173_Eumolpinae sp. 34  | Eumolpinae sp. 34  | Network266 | 3Cluster261 | 5Cluster253 | 75Cluster238 | GMYC027 | PTP030 | H397 |
| BT_2176_Galerucinae sp. 43 | Galerucinae sp. 43 | Network179 | 3Cluster262 | 5Cluster254 | 75Cluster239 | GMYC120 | PTP274 | H276 |
| BT_2179_Alticinae sp. 11   | Alticinae sp. 11   | Network193 | 3Cluster263 | 5Cluster255 | 75Cluster022 | GMYC096 | PTP193 | H300 |
| BT_2180_Alticinae sp. 75   | Alticinae sp. 75   | Network149 | 3Cluster127 | 5Cluster125 | 75Cluster124 | GMYC240 | PTP082 | H230 |
| BT_2181_Alticinae sp. 251  | Alticinae sp. 251  | Network90  | 3Cluster264 | 5Cluster256 | 75Cluster240 | GMYC053 | PTP161 | H143 |
| BT_2182_Galerucinae sp. 29 | Galerucinae sp. 29 | Network95  | 3Cluster202 | 5Cluster197 | 75Cluster184 | GMYC124 | PTP276 | H151 |
| BT_2189_Hispinae sp. 8     | Hispinae sp. 8     | Network249 | 3Cluster265 | 5Cluster257 | 75Cluster241 | GMYC268 | PTP046 | H374 |
| BT_2191_Criocerinae sp. 5  | Criocerinae sp. 5  | Network240 | 3Cluster266 | 5Cluster258 | 75Cluster242 | GMYC263 | PTP056 | H362 |
| BT_2192_Galerucinae sp. 28 | Galerucinae sp. 28 | Network62  | 3Cluster267 | 5Cluster259 | 75Cluster243 | GMYC130 | PTP281 | H098 |
| BT_2193_Alticinae sp. 76   | Alticinae sp. 76   | Network27  | 3Cluster207 | 5Cluster202 | 75Cluster189 | GMYC210 | PTP127 | H039 |
| BT_2194_Alticinae sp. 127  | Alticinae sp. 127  | Network4   | 3Cluster194 | 5Cluster189 | 75Cluster177 | GMYC247 | PTP092 | H004 |
| BT_2196_Alticinae sp. 127  | Alticinae sp. 127  | Network4   | 3Cluster194 | 5Cluster189 | 75Cluster177 | GMYC247 | PTP092 | H004 |
| BT_2197_Eumolpinae sp. 47  | Eumolpinae sp. 47  | Network280 | 3Cluster268 | 5Cluster260 | 75Cluster244 | GMYC015 | PTP022 | H414 |

|                             |                     |            |             |             |              |         |        |      |
|-----------------------------|---------------------|------------|-------------|-------------|--------------|---------|--------|------|
| BT_2208_Alticinae sp. 112   | Alticinae sp. 112   | Network145 | 3Cluster224 | 5Cluster219 | 75Cluster206 | GMYC190 | PTP209 | H224 |
| BT_2312_Alticinae sp. 42    | Alticinae sp. 42    | Network52  | 3Cluster002 | 5Cluster002 | 75Cluster002 | GMYC219 | PTP114 | H086 |
| BT_2491_Alticinae sp. 85    | Alticinae sp. 85    | Network47  | 3Cluster138 | 5Cluster136 | 75Cluster135 | GMYC217 | PTP104 | H070 |
| BT_2492_Alticinae sp. 104   | Alticinae sp. 104   | Network17  | 3Cluster101 | 5Cluster101 | 75Cluster100 | GMYC235 | PTP080 | H027 |
| BT_2495_Alticinae sp. 243   | Alticinae sp. 243   | Network54  | 3Cluster006 | 5Cluster006 | 75Cluster006 | GMYC220 | PTP115 | H089 |
| BT_2496_Alticinae sp. 140   | Alticinae sp. 140   | Network122 | 3Cluster153 | 5Cluster150 | 75Cluster144 | GMYC157 | PTP187 | H192 |
| BT_2498_Alticinae sp. 52    | Alticinae sp. 52    | Network33  | 3Cluster231 | 5Cluster225 | 75Cluster212 | GMYC199 | PTP137 | H047 |
| BT_2499_Alticinae sp. 118   | Alticinae sp. 118   | Network170 | 3Cluster053 | 5Cluster054 | 75Cluster054 | GMYC187 | PTP108 | H263 |
| BT_2502_Alticinae sp.160    | Alticinae sp.160    | Network38  | 3Cluster051 | 5Cluster052 | 75Cluster052 | GMYC151 | PTP071 | H054 |
| BT_2504_Galerucinae sp. 098 | Galerucinae sp. 098 | Network153 | 3Cluster269 | 5Cluster261 | 75Cluster245 | GMYC181 | PTP243 | H236 |
| BT_2505_Galerucinae sp. 46  | Galerucinae sp. 46  | Network155 | 3Cluster026 | 5Cluster027 | 75Cluster027 | GMYC178 | PTP249 | H241 |
| BT_2506_Alticinae sp. 47    | Alticinae sp. 47    | Network198 | 3Cluster270 | 5Cluster262 | 75Cluster246 | GMYC150 | PTP175 | H307 |
| BT_2516_Galerucinae sp. 9   | Galerucinae sp. 9   | Network101 | 3Cluster271 | 5Cluster263 | 75Cluster247 | GMYC142 | PTP261 | H158 |
| BT_2517_Alticinae sp. 201   | Alticinae sp. 201   | Network21  | 3Cluster272 | 5Cluster264 | 75Cluster248 | GMYC233 | PTP076 | H032 |
| BT_2518_Alticinae sp. 70    | Alticinae sp. 70    | Network91  | 3Cluster093 | 5Cluster093 | 75Cluster092 | GMYC055 | PTP160 | H146 |
| BT_2519_Alticinae sp. 153   | Alticinae sp. 153   | Network46  | 3Cluster273 | 5Cluster265 | 75Cluster249 | GMYC218 | PTP106 | H069 |
| BT_2521_Galerucinae sp. 082 | Galerucinae sp. 082 | Network182 | 3Cluster121 | 5Cluster119 | 75Cluster118 | GMYC106 | PTP235 | H279 |
| BT_2522_Alticinae sp. 51    | Alticinae sp. 51    | Network41  | 3Cluster089 | 5Cluster089 | 75Cluster088 | GMYC197 | PTP126 | H057 |
| BT_2523_Alticinae sp. 153   | Alticinae sp. 153   | Network46  | 3Cluster273 | 5Cluster265 | 75Cluster249 | GMYC218 | PTP106 | H069 |
| BT_2529_Galerucinae sp. 55  | Galerucinae sp. 55  | Network201 | 3Cluster087 | 5Cluster087 | 75Cluster086 | GMYC107 | PTP231 | H310 |
| BT_2544_Alticinae sp. 97    | Alticinae sp. 97    | Network13  | 3Cluster035 | 5Cluster036 | 75Cluster036 | GMYC258 | PTP065 | H021 |
| BT_2546_Cassidinae sp. 4    | Cassidinae sp. 4    | Network253 | 3Cluster038 | 5Cluster039 | 75Cluster039 | GMYC284 | PTP053 | H380 |
| BT_2548_Cassidinae sp. 12   | Cassidinae sp. 12   | Network243 | 3Cluster149 | 5Cluster146 | 75Cluster142 | GMYC278 | PTP044 | H366 |
| BT_2550_Alticinae sp. 56    | Alticinae sp. 56    | Network15  | 3Cluster274 | 5Cluster266 | 75Cluster250 | GMYC200 | PTP138 | H023 |
| BT_2572_Alticinae sp. 18    | Alticinae sp. 18    | Network59  | 3Cluster158 | 5Cluster155 | 75Cluster147 | GMYC251 | PTP067 | H095 |
| BT_2573_Cassidinae sp. 12   | Cassidinae sp. 12   | Network243 | 3Cluster149 | 5Cluster146 | 75Cluster142 | GMYC278 | PTP044 | H366 |
| BT_2575_Eumolpinae sp. 31   | Eumolpinae sp. 31   | Network287 | 3Cluster275 | 5Cluster267 | 75Cluster251 | GMYC005 | PTP013 | H423 |
| BT_2576_Alticinae sp. 96    | Alticinae sp. 96    | Network85  | 3Cluster044 | 5Cluster045 | 75Cluster045 | GMYC051 | PTP169 | H131 |
| BT_2578_Galerucinae sp. 34  | Galerucinae sp. 34  | Network183 | 3Cluster037 | 5Cluster038 | 75Cluster038 | GMYC103 | PTP232 | H280 |
| BT_2579_Alticinae sp. 115   | Alticinae sp. 115   | Network10  | 3Cluster030 | 5Cluster031 | 75Cluster031 | GMYC253 | PTP060 | H014 |
| BT_2629_Eumolpinae sp. 29   | Eumolpinae sp. 29   | Network271 | 3Cluster117 | 5Cluster115 | 75Cluster114 | GMYC019 | PTP024 | H403 |
| BT_2631_Alticinae sp. 135   | Alticinae sp. 135   | Network126 | 3Cluster276 | 5Cluster268 | 75Cluster252 | GMYC173 | PTP181 | H199 |
| BT_2632_Alticinae sp. 143   | Alticinae sp. 143   | Network123 | 3Cluster122 | 5Cluster120 | 75Cluster119 | GMYC158 | PTP186 | H195 |
| BT_2637_Eumolpinae sp. 40   | Eumolpinae sp. 40   | Network257 | 3Cluster003 | 5Cluster003 | 75Cluster003 | GMYC001 | PTP003 | H388 |
| BT_2638_Galerucinae sp. 61  | Galerucinae sp. 61  | Network93  | 3Cluster041 | 5Cluster042 | 75Cluster042 | GMYC131 | PTP279 | H149 |
| BT_2640_Alticinae sp. 104   | Alticinae sp. 104   | Network161 | 3Cluster235 | 5Cluster229 | 75Cluster216 | GMYC236 | PTP078 | H250 |
| BT_2641_Alticinae sp. 97    | Alticinae sp. 97    | Network13  | 3Cluster035 | 5Cluster036 | 75Cluster036 | GMYC258 | PTP065 | H017 |
| BT_2642_Eumolpinae sp. 19   | Eumolpinae sp. 19   | Network265 | 3Cluster031 | 5Cluster032 | 75Cluster032 | GMYC028 | PTP004 | H396 |
| BT_2643_Alticinae sp. 42    | Alticinae sp. 42    | Network52  | 3Cluster002 | 5Cluster002 | 75Cluster002 | GMYC219 | PTP114 | H086 |
| BT_2644_Criocerinae sp. 1   | Criocerinae sp. 1   | Network237 | 3Cluster071 | 5Cluster072 | 75Cluster071 | GMYC264 | PTP057 | H359 |
| BT_2646_Alticinae sp. 96    | Alticinae sp. 96    | Network85  | 3Cluster044 | 5Cluster045 | 75Cluster045 | GMYC051 | PTP169 | H131 |
| BT_2657_Alticinae sp. 1     | Alticinae sp. 1     | Network186 | 3Cluster277 | 5Cluster269 | 75Cluster253 | GMYC093 | PTP199 | H284 |
| BT_2658_Alticinae sp. 41    | Alticinae sp. 41    | Network136 | 3Cluster223 | 5Cluster218 | 75Cluster205 | GMYC161 | PTP177 | H211 |
| BT_2659_Alticinae sp. 86    | Alticinae sp. 86    | Network48  | 3Cluster074 | 5Cluster075 | 75Cluster074 | GMYC216 | PTP105 | H075 |
| BT_2661_Hispinae sp. 9      | Hispinae sp. 9      | Network250 | 3Cluster278 | 5Cluster270 | 75Cluster254 | GMYC270 | PTP047 | H375 |
| BT_2662_Alticinae sp. 87    | Alticinae sp. 87    | Network88  | 3Cluster028 | 5Cluster029 | 75Cluster029 | GMYC061 | PTP164 | H140 |
| BT_2663_Hispinae sp. 5      | Hispinae sp. 5      | Network246 | 3Cluster130 | 5Cluster128 | 75Cluster127 | GMYC287 | PTP034 | H371 |
| BT_2665_Criocerinae sp. 4   | Criocerinae sp. 4   | Network239 | 3Cluster189 | 5Cluster184 | 75Cluster172 | GMYC262 | PTP055 | H361 |
| BT_2666_Alticinae sp. 89    | Alticinae sp. 89    | Network199 | 3Cluster279 | 5Cluster271 | 75Cluster255 | GMYC155 | PTP172 | H308 |
| BT_2670_Alticinae sp. 51    | Alticinae sp. 51    | Network41  | 3Cluster089 | 5Cluster089 | 75Cluster088 | GMYC197 | PTP126 | H058 |
| BT_2671_Galerucinae sp. 72  | Galerucinae sp. 72  | Network231 | 3Cluster118 | 5Cluster116 | 75Cluster115 | GMYC073 | PTP225 | H352 |
| BT_2672_Alticinae sp. 51    | Alticinae sp. 51    | Network41  | 3Cluster089 | 5Cluster089 | 75Cluster088 | GMYC197 | PTP126 | H058 |
| BT_2673_Galerucinae sp. 49  | Galerucinae sp. 49  | Network159 | 3Cluster280 | 5Cluster272 | 75Cluster256 | GMYC184 | PTP245 | H246 |
| BT_2697_Alticinae sp. 53    | Alticinae sp. 53    | Network28  | 3Cluster281 | 5Cluster273 | 75Cluster257 | GMYC208 | PTP128 | H040 |
| BT_2698_Eumolpinae sp. 071  | Eumolpinae sp. 071  | Network276 | 3Cluster282 | 5Cluster274 | 75Cluster258 | GMYC016 | PTP026 | H408 |
| BT_2705_Alticinae sp. 94    | Alticinae sp. 94    | Network140 | 3Cluster283 | 5Cluster275 | 75Cluster259 | GMYC148 | PTP173 | H216 |
| BT_2707_Alticinae sp. 34    | Alticinae sp. 34    | Network152 | 3Cluster284 | 5Cluster276 | 75Cluster260 | GMYC238 | PTP081 | H235 |
